# Supplementary material for: Determination of a Predictive Cleavage Motif for Eluted Major Histocompatibility Complex Class II Ligands
Source: Front Immunol. 2018 Aug 6;9:1795. doi: 10.3389/fimmu.2018.01795 (PMC6087742; doi:10.3389/fimmu.2018.01795)
Supplement: Supplementary file 6 [file table_1.xlsx]

## Sheet: ST 1
Supplementary table 1: Potential false positive antigens that were excluded from the analysis.
	Source antigen	Source antigen GI number	Source antigen parent protein	Uniprot accession of source antigen parent protein	Source organism
1	Ubiquitin-60S ribosomal protein L40	302393718	Ubiquitin-60S ribosomal protein L40	P62987	Homo sapiens
2	HLA class II histocompatibility antigen, DRB1-3 chain	1708116	HLA class II histocompatibility antigen, DRB1-3 chain	P01912	Homo sapiens
3	HLA class II histocompatibility antigen, DQB1*0602 beta chain precursor	2506858	HLA class II histocompatibility antigen, DQ beta 1 chain (UniProt:P01920)	P01920	Homo sapiens
4	CD44 antigen	308153615	CD44 antigen (UniProt:P16070)	P16070	Homo sapiens
5	Interferon-gamma receptor alpha chain precursor	124474	Interferon gamma receptor 1	P15260	Homo sapiens
6	Ig mu heavy chain disease protein	127506	Ig mu heavy chain disease protein	P04220	Homo sapiens
7	cancer susceptibility candidate 4, isoform CRA_d	119597667	Protein CASC4	Q6P4E1	Homo sapiens
8	Beta-2-microglobulin precursor	48428791	Beta-2-microglobulin	P61769	Homo sapiens
9	Heat shock protein HSP 90-beta	17865718	Heat shock protein HSP 90-beta	P08238	Homo sapiens
10	HLA class II histocompatibility antigen, DQ alpha 1 chain	122188	HLA class II histocompatibility antigen, DQ alpha 1 chain (UniProt:P01909)	P01909	Homo sapiens
11	carbohydrate sulfotransferase 11 isoform 1	8923758	Carbohydrate sulfotransferase 11	Q9NPF2	Homo sapiens
12	B-cell antigen receptor complex-associated protein alpha chain precursor	75677429	B-cell antigen receptor complex-associated protein alpha chain	P11911	Mus musculus
13	Transforming growth factor beta-1	135674	Transforming growth factor beta-1	P01137	Homo sapiens
14	Trans-Golgi network integral membrane protein 2	158962337	Trans-Golgi network integral membrane protein 2	O43493	Homo sapiens
15	Cytokine receptor common gamma chain precursor	400048	Cytokine receptor common subunit gamma	P31785	Homo sapiens
16	Tumor necrosis factor receptor superfamily member 6	119833	Tumor necrosis factor receptor superfamily member 6	P25445	Homo sapiens
17	Protein lifeguard 1	74738689	Protein lifeguard 1	Q7Z429	Homo sapiens
18	cathepsin S	12803615	Cathepsin S	P25774	Homo sapiens
19	Acyl-CoA-binding protein	118276	Acyl-CoA-binding protein	P07108	Homo sapiens
20	B-cell antigen receptor complex-associated protein beta chain	728994	B-cell antigen receptor complex-associated protein beta chain	P40259	Homo sapiens
21	golgi phosphoprotein 4, isoform CRA_a	119598970	Golgi integral membrane protein 4	O00461	Homo sapiens
22	Heat shock protein HSP 90-alpha	92090606	Heat shock protein HSP 90-alpha	P07900	Homo sapiens
23	Peptidyl-prolyl cis-trans isomerase B	215273869	Peptidyl-prolyl cis-trans isomerase B	P23284	Homo sapiens
24	BCL2/adenovirus E1B 19 kDa protein-interacting protein 3-like	6093509	BCL2/adenovirus E1B 19 kDa protein-interacting protein 3-like	O60238	Homo sapiens
25	Tyrosine-protein kinase JAK1	215274013	Tyrosine-protein kinase JAK1	P23458	Homo sapiens
26	metalloproteinase inhibitor 1 precursor	4507509	Metalloproteinase inhibitor 1 (UniProt:P01033)	P01033	Homo sapiens
27	Beta globin	74739690	Hemoglobin subunit beta	P68871	Homo sapiens
28	Hsc70-interacting protein	6686278	Hsc70-interacting protein	P50502	Homo sapiens
29	Interferon gamma receptor 2	145559548	Interferon gamma receptor 2	P38484	Homo sapiens
30	Endoplasmin	119360	Endoplasmin	P14625	Homo sapiens
31	M6PR	48146941	Cation-dependent mannose-6-phosphate receptor	P20645	Homo sapiens
32	palmitoyl-protein thioesterase 1 precursor	121674797	Palmitoyl-protein thioesterase 1	O88531	Mus musculus
33	Toll-like receptor 7	20140876	Toll-like receptor 7	Q9NYK1	Homo sapiens
34	Bone marrow stromal antigen 2	1705508	Bone marrow stromal antigen 2	Q10589	Homo sapiens
35	Fc-gamma-RIIb1	4099471	Low affinity immunoglobulin gamma Fc region receptor II-b	P31994	Homo sapiens
36	S100 calcium binding protein B	12804681	Protein S100-B	P04271	Homo sapiens
37	Reticulocalbin-1	2493462	Reticulocalbin-1	Q15293	Homo sapiens
38	Ras-related protein Rab-8A	46810392	Ras-related protein Rab-8A	P61006	Homo sapiens
39	CMRF35-like molecule 8	126302534	CMRF35-like molecule 8	Q9UGN4	Homo sapiens
40	Leukocyte antigen CD37	115983	Leukocyte antigen CD37	P11049	Homo sapiens
41	golgi membrane protein GP73	7271867	Golgi membrane protein 1	Q8NBJ4	Homo sapiens
42	Sodium-dependent phosphate transporter 1	74730735	Sodium-dependent phosphate transporter 1	Q8WUM9	Homo sapiens
43	desmocollin-3 isoform Dsc3b preproprotein	148539848	Desmocollin-3	Q14574	Homo sapiens
44	Lysosome-associated membrane glycoprotein 3	126302564	Lysosome-associated membrane glycoprotein 3	Q9UQV4	Homo sapiens
45	Phospholipase A1 member A	124015212	Phospholipase A1 member A	Q53H76	Homo sapiens
46	Tax1-binding protein 1	97202549	Tax1-binding protein 1	Q86VP1	Homo sapiens
47	Myelin basic protein	17378805	Myelin basic protein (UniProt:P02686)	P02686	Homo sapiens
48	Coronin-1A	1706004	Coronin-1A	P31146	Homo sapiens
49	Serine incorporator 1	25453298	Serine incorporator 1	Q9NRX5	Homo sapiens
50	Interferon alpha/beta receptor 2	1352466	Interferon alpha/beta receptor 2	P48551	Homo sapiens
51	Protein lifeguard 3	93117549	Protein lifeguard 3	Q969X1	Homo sapiens
52	CD48	48146141	CD48 antigen (UniProt:P09326)	P09326	Homo sapiens
53	Platelet-activating factor receptor	129557	Platelet-activating factor receptor	P25105	Homo sapiens
54	Ubiquitin-conjugating enzyme E2 D3	46577654	Ubiquitin-conjugating enzyme E2 D3	P61077	Homo sapiens
55	Probable cation-transporting ATPase 13A3	223590262	Probable cation-transporting ATPase 13A3	Q9H7F0	Homo sapiens
56	sequestosome-1 isoform 1	6754954	Sequestosome-1	Q64337	Mus musculus
57	14-3-3 protein gamma	48428721	14-3-3 protein gamma	P61981	Homo sapiens
58	Protein YIPF2	74733454	Protein YIPF2	Q9BWQ6	Homo sapiens
59	N-myc-interactor	116242679	N-myc-interactor	Q13287	Homo sapiens
60	Interferon-induced GTP-binding protein Mx1	251757499	Interferon-induced GTP-binding protein Mx1	P20591	Homo sapiens
61	Lanosterol synthase	1352387	Lanosterol synthase	P48449	Homo sapiens
62	major histocompatibility complex, class II, DM alpha	168985502	HLA class II histocompatibility antigen, DM alpha chain (UniProt:H0Y732)	H0Y732	Homo sapiens
63	60S ribosomal protein L30	51702805	60S ribosomal protein L30	P62888	Homo sapiens
64	amyloid beta A4 protein isoform g	209915575	Gamma-secretase C-terminal fragment 59	E9PEV0	Homo sapiens
65	Signal transducing adapter molecule 2	71153548	Signal transducing adapter molecule 2	O75886	Homo sapiens
66	MAP1LC3B protein	121943399	Microtubule-associated proteins 1A/1B light chain 3B	Q9GZQ8	Homo sapiens
67	histocompatibility 2, class II antigen A, beta 1, partial	3169662	H-2 class II histocompatibility antigen, A-S beta chain	P06345	Mus musculus
68	Disintegrin and metalloproteinase domain-containing protein 10	29337031	Disintegrin and metalloproteinase domain-containing protein 10	O14672	Homo sapiens
69	cadherin 17	9790073	Cadherin-17	Q9R100	Mus musculus
70	rho GDP-dissociation inhibitor 2 isoform 1	33563236	Rho GDP-dissociation inhibitor 2	Q61599	Mus musculus
71	Cystatin-C	118183	Cystatin-C	P01034	Homo sapiens
72	hemopexin, partial	1881768	Hemopexin	Q91X72	Mus musculus
73	Ras-related protein Rab-2A	46577636	Ras-related protein Rab-2A	P61019	Homo sapiens
74	Junctional adhesion molecule A	10720061	Junctional adhesion molecule A	Q9Y624	Homo sapiens
75	Chain A, Crystal Structure Of Human Gate-16	747155020	Gamma-aminobutyric acid receptor-associated protein-like 2	P60520	Homo sapiens
76	B-cell differentiation antigen CD72 isoform 4	160333109	B-cell differentiation antigen CD72 (UniProt:Q3UB58)	Q3UB58	Mus musculus
77	Uncharacterized protein KIAA0174	1723119	IST1 homolog	P53990	Homo sapiens
78	alcam	886258	CD166 antigen (UniProt:Q13740)	Q13740	Homo sapiens
79	Calnexin	543920	Calnexin	P27824	Homo sapiens
80	ecotropic viral integration site 2b	117320522	Protein EVI2B	Q8VD58	Mus musculus
81	Niemann-Pick disease, type C2 precursor variant	62896507	Epididymal secretory protein E1 (UniProt:P61916)	P61916	Homo sapiens
82	Integrin beta-2	124056465	Integrin beta-2	P05107	Homo sapiens
83	Fascin	2498357	Fascin	Q16658	Homo sapiens
84	Ras-related protein Rab-6A	131796	Ras-related protein Rab-6A	P20340	Homo sapiens
85	Aminopeptidase B	20137480	Aminopeptidase B	Q9H4A4	Homo sapiens
86	C-C motif chemokine 5	6175077	C-C motif chemokine 5	P13501	Homo sapiens
87	Insulin-like growth factor-binding protein 7	23396609	Insulin-like growth factor-binding protein 7	Q16270	Homo sapiens
88	Ras-related protein Rab-8B	13638434	Ras-related protein Rab-8B (UniProt:Q92930)	Q92930	Homo sapiens
89	cofilin-1	6680924	Cofilin-1	P18760	Mus musculus
90	unnamed protein product	32433	Serglycin	P10124	Homo sapiens
91	fibrinogen beta chain	78395029	Fibrinogen beta chain	P02675	Homo sapiens
92	SLAM family member 5	74762772	SLAM family member 5	Q9UIB8	Homo sapiens
93	Apolipoprotein C-III	114026	Apolipoprotein C-III	P02656	Homo sapiens
94	ADP-ribosylation factor 1	51316985	ADP-ribosylation factor 1	P84077	Homo sapiens
95	TGF-beta receptor type-1	547777	TGF-beta receptor type-1	P36897	Homo sapiens
96	Transmembrane protein 87A	126302609	Transmembrane protein 87A	Q8NBN3	Homo sapiens
97	C-C motif chemokine 22	311033357	C-C motif chemokine 22	O00626	Homo sapiens
98	Tumor necrosis factor receptor superfamily member 1A	135959	Tumor necrosis factor receptor superfamily member 1A	P19438	Homo sapiens
99	Actin, cytoplasmic 1	46397333	Actin, cytoplasmic 1	P60709	Homo sapiens
100	Glycoprotein integral membrane protein 1	68565324	Glycoprotein integral membrane protein 1	Q9NU53	Homo sapiens
101	MHC H2-IA-beta (aa at 10), partial	459879	H-2 class II histocompatibility antigen, A-D beta chain	P01921	Mus musculus
102	Hematopoietic lineage cell-specific protein	317373440	Hematopoietic lineage cell-specific protein	P14317	Homo sapiens
103	C-Maf-inducing protein	353526341	C-Maf-inducing protein	Q8IY22	Homo sapiens
104	Heterogeneous nuclear ribonucleoprotein A2/B1	219519440	Heterogeneous nuclear ribonucleoproteins A2/B1	O88569	Mus musculus
105	Niemann-Pick C1 protein	743964214	Niemann-Pick C1 protein (UniProt:O15118)	O15118	Homo sapiens
106	capping protein (actin filament) muscle Z-line, beta isoform a	83649737	F-actin-capping protein subunit beta	P47757	Mus musculus
107	ThB	1019625	Lymphocyte antigen 6D	P35459	Mus musculus
108	Amyloid-like protein 2	1703344	Amyloid-like protein 2	Q06481	Homo sapiens
109	Leukosialin	126213	Leukosialin	P16150	Homo sapiens
110	Alpha-(1,6)-fucosyltransferase	20138326	Alpha-(1,6)-fucosyltransferase	Q9BYC5	Homo sapiens
111	Nuclear receptor coactivator 4	8928226	Nuclear receptor coactivator 4	Q13772	Homo sapiens
112	Furin	120611	Furin	P09958	Homo sapiens
113	Sortilin	84028263	Sortilin	Q99523	Homo sapiens
114	Protein SET	46397790	Protein SET	Q01105	Homo sapiens
115	Putative protein FAM10A5	74762570	Putative protein FAM10A5	Q8NFI4	Homo sapiens
116	Solute carrier family 43 member 3	158706361	Solute carrier family 43 member 3	Q8NBI5	Homo sapiens
117	Hypothetical protein DKFZp434B2017	74725010	GTP-binding protein SAR1b	Q9Y6B6	Homo sapiens
118	Ragulator complex protein LAMTOR1	125863645	Ragulator complex protein LAMTOR1	Q6IAA8	Homo sapiens
119	14-3-3 protein epsilon	51702210	14-3-3 protein epsilon	P62258	Homo sapiens
120	Chain A, Structure Of Gtp-Bound L129f Mutant Rab7	284794146	Ras-related protein Rab-7a	P51149	Homo sapiens
121	NEDD4 family-interacting protein 1	74733098	NEDD4 family-interacting protein 1	Q9BT67	Homo sapiens
122	Myosin regulatory light chain 12A	127169	Myosin regulatory light chain 12A	P19105	Homo sapiens
123	Calmodulin	49037474	Calmodulin (UniProt:P62158)	P62158	Homo sapiens
124	Phosphoprotein (Protein P)	133668	Phosphoprotein	Q9WMB4	Measles virus strain Edmonston-B
125	histocompatibility 2, class II antigen A, alpha	31981716	H-2 class II histocompatibility antigen, A-B alpha chain	P14434	Mus musculus
126	Melanocyte protein Pmel 17 precursor	2507099	Melanocyte protein PMEL	P40967	Homo sapiens
127	40S ribosomal protein S17	4506693	40S ribosomal protein S17	P08708	Homo sapiens
128	ubiquitin-conjugating enzyme E2 N	4507793	Ubiquitin-conjugating enzyme E2 N	P61088	Homo sapiens
129	malate dehydrogenase, cytoplasmic isoform 1	312283701	Malate dehydrogenase, cytoplasmic	P40925	Homo sapiens
130	Polypeptide N-acetylgalactosaminyltransferase 1	1709558	Polypeptide N-acetylgalactosaminyltransferase 1	Q10472	Homo sapiens
131	heterogeneous nuclear ribonucleoprotein A3 isoform a	31559916	Heterogeneous nuclear ribonucleoprotein A3	Q8BG05	Mus musculus
132	Dermcidin	20141302	Dermcidin	P81605	Homo sapiens
133	similar to eukaryotic translation elongation factor 1 beta 2; eukaryotic translation elongation factor 1 beta 1	51094833	Elongation factor 1-beta	P24534	Homo sapiens
134	Lipopolysaccharide-induced tumor necrosis factor-alpha factor	83304387	Lipopolysaccharide-induced tumor necrosis factor-alpha factor (UniProt:Q99732)	Q99732	Homo sapiens
135	Voltage-dependent anion-selective channel protein 1	130683	Voltage-dependent anion-selective channel protein 1	P21796	Homo sapiens
136	transient receptor potential cation channel subfamily M member 2	261878536	Transient receptor potential cation channel subfamily M member 2	Q91YD4	Mus musculus
137	band 3, partial	553874	Band 3 anion transport protein	P04919	Mus musculus
138	Programmed cell death protein 1	145559515	Programmed cell death protein 1	Q15116	Homo sapiens
139	Tyrosine-protein kinase Fyn	125370	Tyrosine-protein kinase Fyn	P06241	Homo sapiens
140	BET1-like protein	74734714	BET1-like protein	Q9NYM9	Homo sapiens
141	Transmembrane protein 51	68053240	Transmembrane protein 51	Q9NW97	Homo sapiens
142	WD repeat and FYVE domain-containing protein 1	51316866	WD repeat and FYVE domain-containing protein 1	Q8IWB7	Homo sapiens
143	Inactive rhomboid protein 2	193806488	Inactive rhomboid protein 2	Q6PJF5	Homo sapiens
144	Lipoma HMGIC fusion partner-like 2 protein	116242618	Lipoma HMGIC fusion partner-like 2 protein	Q6ZUX7	Homo sapiens
145	Ubiquitin carboxyl-terminal hydrolase 8	731046	Ubiquitin carboxyl-terminal hydrolase 8	P40818	Homo sapiens
146	Proteasome subunit alpha type-6	46397659	Proteasome subunit alpha type-6	P60900	Homo sapiens
147	Glutathione S-transferase P	121746	Glutathione S-transferase P	P09211	Homo sapiens
148	Signal transducer and activator of transcription 1-alpha/beta	2507413	Signal transducer and activator of transcription 1-alpha/beta	P42224	Homo sapiens
149	Adenylyl cyclase-associated protein 1	308153681	Adenylyl cyclase-associated protein 1	Q01518	Homo sapiens
150	Zinc transporter ZIP3	74732942	Zinc transporter ZIP3	Q9BRY0	Homo sapiens
151	arylsulfatase B precursor	125656171	Arylsulfatase B	P50429	Mus musculus
152	basigin isoform 2	38372925	Basigin (UniProt:P35613)	P35613	Homo sapiens
153	Tumor necrosis factor ligand superfamily member 4	121540	Tumor necrosis factor ligand superfamily member 4	P23510	Homo sapiens
154	ER lumen protein-retaining receptor 2	462018	ER lumen protein-retaining receptor 2	P33947	Homo sapiens
155	Ephrin type-B receptor 1	1706663	Ephrin type-B receptor 1	P54762	Homo sapiens
156	Protein ITFG3	74733531	Protein ITFG3	Q9H0X4	Homo sapiens
157	Gamma-interferon-inducible lysosomal thiol reductase precursor	12643406	Gamma-interferon-inducible lysosomal thiol reductase	P13284	Homo sapiens
158	trans-golgi network protein 2	6678461	Trans-Golgi network integral membrane protein 2	Q62314	Mus musculus
159	60 kDa heat shock protein, mitochondrial precursor	129379	60 kDa heat shock protein, mitochondrial (UniProt:P10809)	P10809	Homo sapiens
160	Tubulin beta-4B chain	55977480	Tubulin beta-4B chain	P68371	Homo sapiens
161	Hematological and neurological expressed 1 protein	74735046	Hematological and neurological expressed 1 protein	Q9UK76	Homo sapiens
162	Growth factor receptor-bound protein 2	51702266	Growth factor receptor-bound protein 2	P62993	Homo sapiens
163	Ribonuclease T2	20139363	Ribonuclease T2	O00584	Homo sapiens
164	Occludin	3914196	Occludin	Q16625	Homo sapiens
165	LAP3 protein	37588925	Cytosol aminopeptidase	P28838	Homo sapiens
166	vitamin D-binding protein, partial	193446	Vitamin D-binding protein	P21614	Mus musculus
167	Ras-related protein Rab-1A	51338603	Ras-related protein Rab-1A	P62820	Homo sapiens
168	integrin beta 2	111607447	Integrin beta-2	P11835	Mus musculus
169	SPARC	129283	SPARC	P09486	Homo sapiens
170	Plexin-B2	126302585	Plexin-B2	O15031	Homo sapiens
171	Apolipoprotein E precursor	114041	Apolipoprotein E	P08226	Mus musculus
172	Phospholipid-transporting ATPase IA	8134331	Phospholipid-transporting ATPase IA	Q9Y2Q0	Homo sapiens
173	putative MHC class II antigen E beta 1 isoform 2	655349021	Other Major histocompatibility complex	-	Mus musculus
174	gamma-actin	178045	Actin, cytoplasmic 2	P63261	Homo sapiens
175	Scavenger receptor class B member 1	37999904	Scavenger receptor class B member 1	Q8WTV0	Homo sapiens
176	cathepsin Z	11066226	Cathepsin Z	Q9WUU7	Mus musculus
177	Semaphorin-4A	29840871	Semaphorin-4A	Q9H3S1	Homo sapiens
178	Serum albumin	113576	Serum albumin	P02768	Homo sapiens
179	Calreticulin precursor	117501	Calreticulin	P27797	Homo sapiens
180	C-1-tetrahydrofolate synthase, cytoplasmic	115206	C-1-tetrahydrofolate synthase, cytoplasmic (UniProt:P11586)	P11586	Homo sapiens
181	actin, gamma, cytoplasmic 1	6752954	Actin, cytoplasmic 2	P63260	Mus musculus
182	CD151 antigen	85687560	CD151 antigen	P48509	Homo sapiens
183	MHC class II antigen	37021671	HLA class II histocompatibility antigen, DP beta 1 chain	P04440	Homo sapiens
184	V-type proton ATPase subunit S1	12230759	V-type proton ATPase subunit S1 (UniProt:Q15904)	Q15904	Homo sapiens
185	Tubulin beta chain	-	Tubulin beta chain	P07437	Homo sapiens
186	ENG protein	15679936	Endoglin	P17813	Homo sapiens
187	Fas apoptotic inhibitory molecule 3	74754378	Fas apoptotic inhibitory molecule 3	O60667	Homo sapiens
188	sema domain, immunoglobulin domain (Ig), transmembrane domain (TM) and short cytoplasmic domain, (semaphorin) 4D	32493365	Semaphorin-4D	Q92854	Homo sapiens
189	Nucleobindin-1	90110780	Nucleobindin-1	Q02818	Homo sapiens
190	HLA class II histocompatibility antigen, DM beta chain	133160	HLA class II histocompatibility antigen, DM beta chain	P28068	Homo sapiens
191	Chain A, Crystal Structure Of Pkm2-k422r Mutant Bound With Fbp	761232741	Pyruvate kinase PKM	P14618	Homo sapiens
192	PGK1	48145549	Phosphoglycerate kinase 1	P00558	Homo sapiens
193	B-cell receptor CD22	6166019	B-cell receptor CD22 (UniProt:P20273)	P20273	Homo sapiens
194	interleukin 2 receptor, beta	168985168	Interleukin-2 receptor subunit beta	P14784	Homo sapiens
195	Lysosome-associated membrane glycoprotein 1	206729915	Lysosome-associated membrane glycoprotein 1 (UniProt:P11279)	P11279	Homo sapiens
196	Myosin-9	6166599	Myosin-9	P35579	Homo sapiens
197	semaphorin-7A isoform 3	225637524	Semaphorin-7A	O75326	Homo sapiens
198	NEF-associated factor 1	116235015	TNFAIP3-interacting protein 1	Q15025	Homo sapiens
199	enolase 1 variant	62897945	Alpha-enolase	P06733	Homo sapiens
