# Supplementary material for: Determination of a Predictive Cleavage Motif for Eluted Major Histocompatibility Complex Class II Ligands
Source: Front Immunol. 2018 Aug 6;9:1795. doi: 10.3389/fimmu.2018.01795 (PMC6087742; doi:10.3389/fimmu.2018.01795)
Supplement: Supplementary file 11 [file table_6.xlsx]

## Sheet: ST 6
Supplementary table 6: Relative frequencies of amino acids at the ligands and the nearby 10 positions showing the pattern of relative enrichment/depletion. This table shows the values generated from ligands of all lengths included in the data, i.e. 13-23.
Amino acid	N-10	N-9	N-8	N-7	N-6	N-5	N-4	N-3	N-2	N-1	N0	N+1	N+2	N+3	N+4	N+5	N+6	N+7	N+8	N+9	N+10	C-3	C-2	C-1	C0	C+1	C+2	C+3	C+4	C+5	C+6	C+7	C+8	C+9	C+10
W	0.95	1.09	0.93	0.87	0.84	0.85	0.96	1.07	1.01	1.08	0.65	0.46	1.13	1.45	1.74	1.29	0.9	0.54	0.34	0.62	0.55	0.73	0.7	0.73	0.48	0.79	1.2	1.16	1	0.85	0.83	1.08	0.96	1.14	1.22
F	1.04	1.07	1.08	1.18	1.14	0.99	1.07	1.01	0.99	1.13	0.78	0.63	0.98	1.62	2.24	1.33	0.93	0.64	0.64	0.5	0.48	0.52	0.6	0.91	0.6	1.14	0.98	1.01	1.09	0.97	0.96	1.01	0.89	1.06	0.91
Y	0.96	0.88	0.98	1.23	1.22	1.13	1.25	1.05	1.08	1.18	0.95	0.53	1.25	1.99	2.98	1.65	0.93	0.7	0.63	0.57	0.7	0.62	0.58	0.83	0.57	1.09	1.07	1.12	1.08	1.05	1.1	1.19	1.23	1.18	1.1
I	0.99	0.93	0.93	0.87	0.89	1	0.9	0.94	0.9	0.63	1.35	0.84	0.85	1.06	1.42	1.08	1.01	1.02	1.01	0.98	1	1.1	1.01	1.33	0.37	1.07	1.02	0.96	0.98	0.93	0.92	0.95	0.96	0.88	0.88
V	0.99	0.93	0.98	0.99	1.01	1.04	1.07	1.08	1.04	0.62	1.22	0.82	0.94	0.97	1.15	0.98	0.94	1.02	1.16	1.17	1.08	1.1	1.04	1.29	0.5	1.17	1.06	1.07	0.94	1.04	1.04	1.04	1.1	0.98	1.01
L	1	0.99	1	0.96	0.97	0.98	0.96	0.96	0.98	0.93	0.8	0.48	0.62	0.66	0.7	0.74	0.85	0.97	0.65	0.62	0.76	0.85	0.76	0.85	0.71	1.17	1.03	1.07	0.95	1	0.95	0.89	0.94	0.87	0.91
M	0.99	1.13	1.15	0.91	0.89	0.9	1.14	1.05	1.26	1.32	0.45	0.37	0.43	0.54	0.59	0.78	1.01	0.85	0.58	0.56	0.5	0.63	0.49	0.61	0.69	1.23	1.07	1.02	1.08	1.01	0.97	1.04	0.99	0.99	0.94
C	0.53	0.6	0.63	0.59	0.69	0.76	0.61	0.68	0.66	0.71	0.01	0.03	0.04	0.07	0.05	0.08	0.21	0.12	0.24	0.3	0.18	0.18	0.12	0.11	0.04	1.02	0.79	0.8	0.83	0.76	0.78	0.79	0.57	0.67	0.54
D	1.02	1.08	1	1.04	1.05	1.01	1.01	1.04	0.96	0.93	1.94	1.5	1.3	1.18	0.71	0.66	0.74	0.96	0.8	0.85	0.86	0.94	1.24	1.2	1.07	0.93	0.93	0.94	1	1.03	1.01	0.96	1.05	1.01	1.08
E	1.03	1.1	1.03	1.01	1.07	1.02	0.92	1.01	1.04	1.14	1.2	1	1.26	1.14	0.96	0.99	0.9	1	1.04	1.22	1.24	1.28	1.19	1.17	1.2	1.05	1.07	1.07	1.06	1.02	1.12	1.08	1.05	1.15	1.11
G	1.07	1.04	1.09	1.02	1	1	0.99	1.02	0.94	1.19	1.31	1.03	1.17	0.89	0.78	1.01	1.23	1.22	1.03	1.03	0.89	1.06	1.1	0.55	1.39	0.83	0.95	0.87	0.96	0.98	0.93	0.97	0.96	1.01	0.96
A	1.02	1.05	1.06	1.04	1.14	1.22	1.17	1.08	1.17	1.05	1.22	0.89	1.06	1.13	1.29	1.59	1.97	1.96	2.07	2.3	1.91	1.61	1.42	1.14	1.01	1.22	1.11	1.14	1.16	1.13	1.08	1.07	1.01	1.05	1.06
P	1.13	1.08	1.1	1.08	1.09	1.01	0.99	0.93	0.81	0.27	0.2	4.01	1.39	1.03	0.98	0.67	0.9	1.39	1.44	1.43	1.37	1.27	1.24	2.12	1.15	0.3	0.85	0.87	0.96	1.03	1	1.04	1.04	1.09	1
H	1.14	1.14	0.94	1	0.93	0.83	0.77	0.81	0.86	0.76	0.71	0.69	0.93	0.96	0.92	1.04	0.69	0.62	0.81	0.83	1.09	1.12	1.07	0.95	1.27	0.81	0.87	0.94	0.89	0.96	0.97	1.11	1.2	1.09	1.08
K	0.93	0.93	1.03	0.98	0.91	0.99	0.97	1.01	0.96	1.22	1.03	0.84	1.07	0.92	0.75	0.83	0.67	0.65	0.81	0.65	0.6	0.6	0.8	0.94	1.6	1.02	1.07	1.06	1.08	1.02	1.06	0.98	1.01	0.87	0.98
R	0.9	0.97	0.99	0.97	0.9	1	0.92	1.11	0.98	1.28	0.92	0.77	1.13	0.75	0.73	0.85	0.64	0.5	0.69	0.59	0.91	0.92	1.2	0.98	1.91	1.16	1.04	1.01	0.91	0.91	0.87	0.95	0.95	1.05	0.99
S	1.01	0.94	0.96	1.02	0.96	0.92	0.99	0.98	1.11	1.07	1.16	0.89	0.95	1.03	0.77	1.17	1.33	1.19	1.24	1.13	1.1	1.14	1.11	0.84	0.82	0.92	0.9	0.92	0.97	0.96	0.96	0.92	0.95	1.02	1.01
T	1.06	1.02	0.98	0.97	1.06	1	1.01	0.93	1.1	1.2	0.93	0.81	0.93	1.06	0.9	1.28	1.32	1.07	1.09	0.97	0.94	0.91	0.87	0.79	0.95	0.95	1	0.94	1.02	1.04	1.04	0.99	1	0.95	1.08
N	1	0.94	0.98	1.13	1.06	1.08	1.01	1.03	0.96	1.31	1	1	0.95	0.73	0.61	0.72	0.56	0.61	0.77	0.92	1.1	0.95	1	0.63	1.22	1.01	1.11	1.04	1.05	1.02	1.02	0.96	1	1.01	0.97
Q	0.96	1.02	0.89	0.9	0.84	0.87	1.11	1.04	1.02	1.17	0.64	0.88	1.04	1.08	0.9	1.07	0.97	0.94	1	0.87	1.18	1.04	1.04	1.01	1.5	1	0.92	0.98	0.95	0.97	1.15	1.16	1.08	1.01	1.12
