# Supplementary material for: Determination of a Predictive Cleavage Motif for Eluted Major Histocompatibility Complex Class II Ligands
Source: Front Immunol. 2018 Aug 6;9:1795. doi: 10.3389/fimmu.2018.01795 (PMC6087742; doi:10.3389/fimmu.2018.01795)
Supplement: Supplementary file 12 [file table_7.xlsx]

## Sheet: ST 7
Supplementary table 7: Relative frequencies of amino acids at the ligands and the nearby 10 positions showing the pattern of relative enrichment/depletion, estimated from ligands of each length separately. Tables A-K represents each of the lengths considered 13-23 respectively.
A	Length = 13	N-10	N-9	N-8	N-7	N-6	N-5	N-4	N-3	N-2	N-1	N0	N+1	N+2	N+3	N+4	N+5	N+6	N+7	N+8	N+9	N+10	C-1	C0	C+1	C+2	C+3	C+4	C+5	C+6	C+7	C+8	C+9	C+10
	W	0.88	1.22	0.76	1.03	0.88	0.91	1.03	0.99	1.21	1.1	1.1	0.98	2.23	1.81	1.4	0.64	0.42	0.15	0.38	0.64	0.64	0.87	0.34	0.65	1.15	1.16	1.01	0.93	1.13	1.13	1.18	1.53	1.42
	F	0.95	0.95	1.18	1.25	1.02	0.83	1.08	0.91	1.07	1.35	1.05	0.94	1.51	1.96	1.31	0.75	0.47	0.4	0.53	0.45	0.5	0.99	0.62	1.18	1.05	1.01	1.02	1.01	1.02	1.06	0.97	1.05	1.2
	Y	0.7	0.88	0.88	1.03	1.01	1.17	1.18	0.93	1.2	1.13	1.04	0.96	2.25	2.75	2.07	0.93	0.41	0.55	0.52	0.59	0.45	0.73	0.52	1.25	1.31	1.31	1.21	0.9	0.94	1.24	1.15	1.02	1.34
	I	1.16	1.14	1.04	0.93	1.05	0.96	0.95	0.98	0.93	0.51	1.47	1.24	1.21	1.43	1.3	0.88	1.05	1.08	1.07	1.12	1.42	2.14	0.41	1.22	0.95	0.9	1.05	0.96	0.89	1.04	0.95	0.89	0.94
	V	1.04	0.86	1.03	1.05	1.08	0.93	1.01	0.92	1.19	0.5	1.23	1.18	1	1.09	1.12	0.84	1.28	1.24	1.34	0.99	1.05	1.67	0.46	1.19	1.19	1.19	0.72	0.94	1.09	0.92	1.24	0.99	0.99
	L	1.14	0.96	1.08	1.08	1.02	1.02	0.99	0.96	0.93	1.07	0.8	0.53	0.64	0.71	0.69	0.98	0.92	0.75	0.59	0.65	0.97	1.13	0.84	1.34	1.11	1.1	1.04	1.17	1	0.79	0.99	0.88	0.98
	M	1.06	1.14	1	1	1.08	0.78	1	1.18	1.5	1.45	0.43	0.32	0.46	0.56	0.7	0.7	0.88	0.48	0.35	0.59	0.43	0.94	1.05	1.39	1.06	1.07	1.12	1.1	0.91	1.11	0.89	1.28	1.01
	C	0.5	0.63	0.79	0.68	0.7	1.1	0.61	0.74	0.81	0.83	0	0.02	0.04	0.04	0.04	0.16	0.34	0.18	0.22	0.25	0.04	0.22	0.02	1.18	1	0.89	1.03	0.76	0.87	0.72	0.67	0.88	0.61
	D	0.99	1.01	0.87	0.97	1.03	1.06	1.06	1.09	0.95	1.01	1.81	1.47	1.1	0.87	0.66	0.84	1.19	1.15	0.98	0.96	1.01	0.98	0.67	0.89	0.84	0.98	0.99	1.34	1.04	1.05	1.09	0.86	0.89
	E	1.13	1.12	0.9	1.03	1.02	1.01	0.93	1.19	1	1.1	1.24	1.11	1.27	0.95	0.92	0.98	1	1.21	1.45	1.68	1.2	1.01	1.08	0.95	0.92	0.97	1.08	1.04	1	1.01	1.05	1.08	1.1
	G	0.87	1.22	1.2	1.07	0.94	1.13	1.14	0.97	0.99	1.12	1.23	0.94	0.97	0.91	1.11	1.13	1.2	1.09	0.87	1.12	0.72	0.41	1.2	0.77	0.98	0.92	1.07	1.02	0.96	1.01	0.91	1.02	0.9
	A	0.97	1.34	1.1	1.02	1.12	1.18	1.06	1.07	1.23	0.83	0.96	0.98	1.02	1.15	1.77	1.84	2.06	1.88	2	1.87	1.51	1.36	1.15	1.29	1.05	1.12	1.07	1.08	1.03	1.08	0.94	0.89	1.03
	P	1.13	0.81	0.91	0.95	1.1	0.9	1.02	0.82	0.79	0.26	0.23	2.72	0.95	0.82	0.62	0.75	0.98	1.37	1.57	1.59	1.29	1.07	1.04	0.28	0.71	0.67	0.75	0.79	0.86	1.13	1	1.11	0.92
	H	1.15	1.12	0.82	1.01	1.03	0.77	0.7	0.86	0.84	0.86	0.51	0.86	1.04	1.18	1.11	0.81	0.42	0.81	1.04	1.27	1.27	0.65	1.32	0.92	0.59	0.92	1.09	0.88	0.88	0.89	1.08	1.3	1.4
	K	0.9	1.02	0.98	0.92	1.01	0.97	0.89	1.05	0.72	1.12	1.17	0.7	0.88	0.77	0.76	0.74	0.56	0.78	0.55	0.53	0.7	0.72	1.83	0.82	1.17	0.99	1.25	0.92	1.1	0.97	0.91	0.85	0.94
	R	0.98	0.93	1.12	0.87	0.84	1	1.01	1.09	0.8	1.21	1.05	0.71	0.94	0.74	0.76	0.66	0.42	0.6	0.75	0.76	1.3	1.03	2.19	0.98	0.98	1.07	0.88	0.95	0.88	0.75	0.81	1.08	0.97
	S	0.96	0.87	0.91	1.02	0.98	0.91	0.89	1.04	1.1	1	1.06	0.94	0.9	0.88	0.97	1.46	1.36	1.16	1.16	0.84	1	0.88	0.65	0.86	0.96	1.03	0.93	0.86	0.98	0.89	0.95	1.07	1.03
	T	1.06	0.91	1.07	0.95	0.91	0.98	0.86	0.95	1.12	1.24	0.85	0.73	0.86	0.89	1.08	1.61	1.33	1.12	0.91	0.75	1.01	0.81	0.85	0.96	1	0.79	0.86	1.05	1.12	1.14	1.04	0.76	0.95
	N	0.99	0.88	1.11	1.18	1.03	1.19	1.15	1.06	0.87	1.61	1	1	0.74	0.65	0.66	0.72	0.55	0.77	1.02	1.14	1.17	0.45	1.46	0.85	0.94	0.93	1.03	1	0.99	1.1	1.04	1.1	1.02
	Q	1.01	0.9	0.75	0.78	0.95	0.92	1.29	1.06	0.96	1.25	0.74	0.98	0.94	0.91	0.99	0.84	0.8	0.99	0.84	1.03	0.93	0.94	1.72	0.96	1	1.02	1.06	0.96	1.17	1.29	1.16	1.19	0.86
B	Length = 14	N-10	N-9	N-8	N-7	N-6	N-5	N-4	N-3	N-2	N-1	N0	N+1	N+2	N+3	N+4	N+5	N+6	N+7	N+8	N+9	N+10	C-2	C-1	C0	C+1	C+2	C+3	C+4	C+5	C+6	C+7	C+8	C+9	C+10
	W	1.02	1.21	0.79	0.84	0.87	0.95	0.78	1.03	1.08	1.22	0.61	0.67	1.53	2.22	1.61	0.94	0.36	0.19	0.31	0.42	0.64	0.81	0.78	0.25	0.62	1.21	0.9	0.91	0.97	0.8	1.12	0.95	1.21	1.44
	F	1.11	0.94	1.04	1.23	1.09	1.09	1.07	0.94	0.83	1.2	0.87	0.68	1.36	2.31	2	0.91	0.54	0.34	0.45	0.53	0.41	0.53	0.96	0.48	1.15	0.99	0.86	1.22	0.91	1.05	1.03	0.9	1.12	0.97
	Y	0.99	0.88	1.01	1.24	1.14	1.08	1.33	0.93	0.96	1.29	1.06	0.6	2.04	3.08	2.67	1.38	0.68	0.38	0.52	0.73	0.57	0.49	0.82	0.56	1.15	1.09	1.31	1.03	1.01	1.13	1.22	1.26	1.38	1.18
	I	1.07	0.95	1.14	0.88	0.95	0.87	0.95	0.89	0.91	0.59	1.4	0.87	1.05	1.37	1.45	1.2	0.9	0.96	0.98	0.97	1.14	1.28	1.71	0.39	1.03	1.07	0.96	0.78	0.81	0.96	0.91	1.12	0.91	0.95
	V	1	0.98	1.03	1.02	1.1	1.06	1	0.99	1.04	0.62	1.07	0.97	1.08	1.08	1.27	0.85	0.85	1.14	1.25	1.2	0.97	1.34	1.5	0.48	1.31	1.13	1.15	0.86	0.98	0.88	1.15	1.19	0.97	1.11
	L	1.01	1	0.97	1.05	0.98	1.01	0.97	0.89	0.96	0.91	0.81	0.43	0.64	0.81	0.61	0.81	1.2	0.8	0.57	0.67	0.79	1	1.04	0.74	1.11	1.03	1.15	1	0.99	0.97	0.84	0.96	0.97	0.9
	M	1	1.2	1.07	0.84	0.92	0.99	1.19	0.87	1.26	1.24	0.48	0.33	0.44	0.59	0.65	1.04	0.96	0.63	0.35	0.43	0.67	0.57	0.68	0.76	1.25	1.11	1.04	1.02	0.83	0.95	1.01	1.26	1.17	0.96
	C	0.58	0.63	0.72	0.77	0.65	0.69	0.79	0.84	0.55	0.85	0.03	0.03	0.09	0.08	0.03	0.11	0.25	0.14	0.32	0.27	0.19	0.22	0.17	0.02	1.17	0.96	0.93	0.86	0.89	0.73	0.8	0.8	0.69	0.41
	D	1.16	1.07	0.93	1.01	1.08	1.22	1.2	1.14	1.05	1.01	1.69	1.35	1.06	0.99	0.55	0.53	0.92	1.07	0.8	0.93	0.85	0.97	1	0.99	0.97	0.87	0.9	1.11	1.12	1.11	0.99	0.96	0.98	0.99
	E	1.04	1.12	1.07	1.01	1.07	0.98	1	1.1	1.01	1.11	1.3	1.13	1.24	1.05	0.86	0.91	0.91	1.02	1.08	1.51	1.48	1.16	0.99	1.11	1.02	1	1.01	1.26	1.11	1.07	1.12	0.96	1.03	0.99
	G	0.97	1.01	1.16	1.04	1.02	1.07	1.07	1.05	1.01	1.31	1.23	1.13	1.03	0.69	0.91	1.19	1.21	1.17	1.17	0.77	1.09	0.94	0.5	1.27	0.87	0.98	0.88	0.96	0.95	0.92	1.04	0.92	1.01	1.13
	A	1.02	1.04	1.01	0.98	1.16	1.25	1.05	1.02	1.14	1.07	1.17	1.07	1.08	1.03	1.54	1.86	2.07	2.12	2.25	2.19	1.52	1.57	1.33	1.07	1.32	1.08	1.08	1.04	1.09	1.1	1.05	0.92	1.03	1.06
	P	1.08	1.01	1.04	1.11	0.98	0.97	0.95	0.85	0.88	0.22	0.08	2.96	1.19	0.67	0.74	0.61	0.97	1.59	1.47	1.45	1.42	1.04	1.34	1.04	0.25	0.71	0.81	0.95	1.03	1.01	0.97	1.05	1.02	0.89
	H	1.27	1.17	1.02	0.95	0.8	0.68	0.81	0.79	0.79	0.74	0.82	0.69	0.82	0.97	1.05	0.87	0.46	0.64	0.91	0.89	1.46	0.81	0.74	1.4	0.67	0.9	0.92	0.91	1.01	0.78	1.09	1.01	1.26	1.13
	K	0.85	0.95	0.9	1.01	0.9	0.98	0.86	1.12	1	1.17	1.19	0.85	0.87	0.68	0.72	0.75	0.55	0.7	0.8	0.57	0.41	0.58	0.96	1.78	0.96	0.99	1.11	1.15	1.03	1.06	0.91	0.93	0.9	0.99
	R	0.86	1.02	0.98	0.83	0.86	1	0.95	1.12	0.99	1.12	0.94	0.77	1.03	0.69	0.78	0.71	0.5	0.49	0.72	0.66	0.98	1.24	1.01	2.25	0.96	1.04	1.06	0.89	1	0.84	0.98	0.89	1	1.04
	S	1	0.94	0.93	1.03	0.86	0.83	0.85	0.98	1.11	1.09	1.17	1.01	0.83	0.8	0.87	1.34	1.37	1.18	1.19	1.04	1.04	1.09	0.93	0.8	0.98	0.93	0.93	0.87	1.04	1.06	0.83	0.96	0.99	1
	T	1.13	1.01	0.95	0.96	1.13	0.91	1.04	1	1.18	1.12	0.94	0.94	0.96	0.98	0.97	1.35	1.49	1.21	0.96	0.91	0.81	0.84	0.91	0.89	0.93	1.09	0.85	0.98	1.08	1.07	1.13	1.04	0.92	0.93
	N	0.96	0.9	1.05	1.1	1.13	1.07	0.99	1.11	0.9	1.27	1.08	1.12	0.81	0.62	0.63	0.76	0.49	0.66	0.89	1.11	1.33	0.95	0.54	1.19	0.99	1.04	0.99	1.16	0.95	1.05	0.96	1.03	0.92	0.97
	Q	0.79	1.02	0.96	0.81	0.88	0.87	1.1	1.11	1.04	1.15	0.72	1.14	1.07	0.9	0.93	1.1	0.89	1.02	0.9	0.93	1.16	0.95	0.86	1.61	0.92	0.96	1.03	0.98	0.89	1.1	1.06	1.1	0.91	1.07
C	Length = 15	N-10	N-9	N-8	N-7	N-6	N-5	N-4	N-3	N-2	N-1	N0	N+1	N+2	N+3	N+4	N+5	N+6	N+7	N+8	N+9	N+10	C-3	C-2	C-1	C0	C+1	C+2	C+3	C+4	C+5	C+6	C+7	C+8	C+9	C+10
	W	1.15	1.12	1.09	0.86	0.8	0.98	1.06	1.11	0.9	1.16	0.59	0.41	0.98	1.77	2.05	1.03	0.54	0.21	0.08	0.33	0.41	0.46	0.74	0.62	0.49	0.88	1.12	1.25	1.15	1.02	0.95	0.92	0.77	1.12	1.12
	F	0.95	0.98	0.98	1.1	1.21	0.98	1.01	0.97	0.92	1.07	0.67	0.62	0.89	2.02	2.85	1.15	0.69	0.36	0.39	0.46	0.53	0.52	0.61	0.97	0.57	1.06	0.84	1.04	1.09	1.06	0.8	1.04	0.92	1.1	0.98
	Y	1.01	0.87	1.16	1.31	1.11	1.13	1.17	1.11	0.96	1.11	0.93	0.48	1.25	2.54	3.92	1.76	0.71	0.51	0.44	0.5	0.8	0.51	0.63	0.98	0.57	1.02	1	1.16	1.02	1.07	1.3	1.09	1.28	1.23	1.01
	I	1	0.85	0.88	0.86	0.87	1.02	0.97	1	0.89	0.69	1.39	0.88	0.99	1.3	1.39	1.21	1.12	0.84	1.01	0.98	0.93	1.27	1.19	1.24	0.35	1.17	1.17	0.89	0.82	0.97	0.87	1.04	0.95	1.05	0.84
	V	0.88	0.99	0.96	0.99	0.99	1.09	1.15	0.88	0.98	0.58	1.24	0.87	1.06	1.08	1.19	1	0.77	0.97	1.23	1.24	1.07	1.21	1.18	1.18	0.5	1.21	1.01	1.02	0.95	1	1.05	1	1.03	0.97	1.14
	L	1.02	0.99	1.04	0.91	0.97	0.93	0.89	0.94	0.89	0.89	0.85	0.48	0.55	0.79	0.69	0.69	0.96	1.09	0.54	0.61	0.76	1.05	0.77	0.79	0.71	1.19	1.08	1.05	0.94	0.89	0.9	0.89	1.06	0.84	0.89
	M	1.03	1.04	1.14	0.99	0.9	0.82	1.03	1	0.96	1.16	0.47	0.37	0.47	0.57	0.64	0.89	1.23	0.98	0.49	0.45	0.39	0.52	0.44	0.57	0.45	1.14	1.16	1.08	0.98	0.93	0.93	1.32	0.95	0.99	1.05
	C	0.64	0.65	0.65	0.67	0.85	0.74	0.72	0.87	0.76	0.76	0.01	0.04	0.06	0.1	0.07	0.09	0.3	0.15	0.3	0.34	0.21	0.12	0.13	0.09	0.04	1.01	0.92	0.82	0.79	0.6	0.77	0.88	0.46	0.59	0.7
	D	0.91	1.25	0.97	1.01	0.98	1.01	1.09	1.13	1.12	0.97	1.89	1.5	1.13	1.1	0.63	0.58	0.72	0.91	0.73	0.82	0.84	0.92	1.06	1.24	1.09	0.96	0.92	0.87	1.08	0.95	0.93	0.91	0.99	0.99	1.24
	E	1.01	0.99	1.03	1.03	1.14	0.95	0.96	0.98	1.07	1.17	1.26	1.11	1.23	1.12	0.91	0.92	0.87	1.06	0.93	1.13	1.32	1.26	1.07	1.2	1.28	0.99	1.1	1.18	1.08	1.03	1.09	1.02	0.94	1.19	1.12
	G	1.08	1	1.07	1.13	1.06	1	0.97	1.04	0.94	1.31	1.21	1.16	1.04	0.69	0.7	1	1.48	1.14	1.15	1.04	0.68	1.02	1.14	0.47	1.41	0.86	0.95	0.92	1.02	0.97	1.01	0.84	0.99	1.09	0.92
	A	1.05	1.03	1.03	1.03	1.12	1.14	1.16	1.09	1.12	0.97	1.29	0.92	1.08	1.07	1.25	1.71	2.17	1.9	2.34	2.39	1.89	1.64	1.63	1.19	1.04	1.15	1.15	1.12	1.09	1.17	1.07	1.04	1	1.03	1.09
	P	1.08	1.16	1.03	0.96	1.06	1	0.99	0.84	0.82	0.14	0.12	2.98	1.27	0.82	0.5	0.56	0.82	1.59	1.66	1.43	1.27	1.12	1	2.04	1.09	0.3	0.8	0.85	0.95	1.06	1.02	1.07	1.04	1.04	0.98
	H	1.15	1.23	0.97	0.95	0.95	0.92	0.89	0.98	0.78	0.78	0.78	0.85	0.88	0.84	0.87	1.21	0.61	0.48	0.6	0.99	1.29	0.96	0.84	1.11	1.32	0.83	1.09	0.96	0.73	0.96	1.06	1.14	1.19	1.16	1.06
	K	0.96	0.86	1	0.97	0.92	0.95	0.98	1.02	1.05	1.31	1.14	0.95	1.12	0.84	0.69	0.81	0.56	0.75	0.81	0.66	0.75	0.57	0.73	1.05	1.57	0.96	0.99	1.14	1.1	0.99	1.04	0.96	1.18	0.81	0.9
	R	0.89	1.09	1.01	1.05	0.83	1.13	0.81	1.2	1.16	1.29	0.82	0.78	1.27	0.63	0.69	0.83	0.51	0.56	0.63	0.59	1.04	0.92	1.16	1.13	1.88	1.13	0.99	0.94	0.96	0.91	0.89	0.98	0.95	0.96	0.89
	S	1.05	0.97	0.98	1.04	1.01	0.93	0.97	1.02	1.1	0.99	1.1	1.06	0.89	0.9	0.74	1.23	1.43	1.31	1.22	1.14	1.09	1.15	1.3	0.86	0.89	0.93	0.8	0.89	1.07	1.05	0.95	0.97	1.01	1.04	0.97
	T	1.02	0.92	0.95	0.95	1.02	1.06	0.93	0.91	1.11	1.27	0.94	0.91	1	1.01	0.88	1.28	1.15	1.13	1.17	0.9	0.9	0.96	0.85	0.69	1.06	1.06	0.99	0.92	1.04	1.06	1.08	1.07	0.97	0.88	1.04
	N	1.21	1	1.1	1.14	1.06	1.11	1.1	1.09	1.02	1.44	1.07	1.21	1	0.73	0.59	0.69	0.58	0.6	0.77	1.11	1.12	0.95	0.95	0.7	1.09	0.96	1.12	1.03	1.05	1.02	1.11	1	0.98	1.08	0.93
	Q	0.9	0.98	0.91	0.89	0.83	0.89	1.12	0.94	1.09	1.17	0.62	0.92	1.31	0.94	0.76	1.14	0.98	0.88	1.02	0.86	1.23	0.83	0.93	1.01	1.45	0.98	0.96	0.99	0.89	1.07	1.1	1.17	0.97	0.98	1.12
D	Length = 16	N-10	N-9	N-8	N-7	N-6	N-5	N-4	N-3	N-2	N-1	N0	N+1	N+2	N+3	N+4	N+5	N+6	N+7	N+8	N+9	N+10	C-4	C-3	C-2	C-1	C0	C+1	C+2	C+3	C+4	C+5	C+6	C+7	C+8	C+9	C+10
	W	1.15	1.3	0.94	0.94	0.76	0.56	1.08	0.99	1.13	1.07	0.67	0.43	0.84	1.3	2.43	1.39	0.72	0.35	0.29	0.2	0.41	0.52	0.67	0.64	0.67	0.67	0.85	1.23	1.23	0.97	0.77	0.8	0.86	0.92	1.07	1.19
	F	0.99	1.03	0.95	1.2	0.96	0.99	0.97	1.16	1.05	1.01	0.82	0.58	0.83	1.33	3.12	1.49	0.88	0.52	0.6	0.23	0.48	0.54	0.5	0.77	0.81	0.52	0.95	1.07	0.97	1.03	0.9	1.04	0.98	0.99	1.05	0.98
	Y	0.87	0.79	0.9	1.26	1.37	1.02	1.31	1.07	1.03	1.09	0.9	0.53	0.84	1.58	4.53	1.96	1	0.57	0.49	0.4	0.73	0.82	0.57	0.77	0.83	0.54	1.14	1.03	1.09	0.92	1.22	0.83	1.24	1.33	1.02	1.18
	I	0.98	0.98	0.89	0.8	0.93	1.06	0.84	0.97	0.89	0.71	1.46	0.79	0.72	1.02	1.83	1.1	0.87	1.03	0.88	0.89	0.94	1.09	1.25	0.8	1.04	0.41	1.02	0.95	0.94	1.06	0.96	1.03	1.04	1.03	0.91	0.92
	V	0.97	0.89	1.01	0.95	0.97	1.1	1.05	1.18	0.98	0.57	1.29	0.8	0.9	1.04	1.25	1.03	0.8	0.91	1.17	1.34	1.11	1.22	1.34	0.9	1.24	0.57	1.13	1.07	1.03	0.98	1.19	1.07	1.06	1.14	1.09	1
	L	0.98	0.92	1.04	0.93	1.02	0.92	0.87	1.04	0.97	0.9	0.84	0.52	0.68	0.64	0.87	0.63	0.72	1.31	0.67	0.48	0.84	0.94	1.05	0.64	0.76	0.69	1.22	1.01	1.02	0.89	0.96	1.01	1	0.93	0.84	0.87
	M	0.79	1.2	1.2	0.81	0.94	1.17	0.98	1.17	1.18	1.45	0.4	0.32	0.4	0.59	0.63	0.8	1.16	1.18	0.74	0.34	0.44	0.7	0.7	0.46	0.38	0.61	1.07	1.04	0.83	1.06	1.1	0.97	0.97	0.82	0.94	0.73
	C	0.54	0.53	0.66	0.47	0.74	0.8	0.57	0.63	0.6	0.68	0	0.03	0	0.05	0.03	0.03	0.16	0.13	0.19	0.37	0.26	0.29	0.26	0.02	0.06	0.05	1.04	0.57	0.7	0.74	0.76	0.84	0.73	0.6	0.6	0.75
	D	0.95	1.01	1.05	0.93	1.12	1.02	1.02	1.18	1.01	0.91	1.83	1.53	1.43	1.26	0.56	0.64	0.59	0.91	0.72	0.77	0.9	0.87	0.83	1.25	1.48	1.3	0.88	1.03	1.05	0.96	1.06	0.93	0.91	1.06	1.07	1.19
	E	1.15	1.1	1.06	1.08	1	1.02	0.94	0.91	1.09	1.27	1.02	1.01	1.31	1.24	0.81	0.97	0.76	0.88	1.02	0.99	1.18	1.14	1.12	1.05	1.35	1.26	1.18	1.13	1.14	1	0.98	1.13	0.97	1.06	1.14	1.13
	G	1.16	1.01	1.01	0.99	1.04	1	1	1	0.89	1.16	1.23	1.13	1.2	0.74	0.52	0.98	1.46	1.47	1	1.17	0.69	0.83	0.97	1.2	0.6	1.5	0.85	0.92	0.91	0.92	1.04	0.89	0.98	0.97	1.05	0.87
	A	0.93	1.02	1.14	1.07	1.17	1.22	1.26	1.04	1.05	1.02	1.33	0.94	1.04	1.19	0.96	1.6	2.16	1.97	1.91	2.83	1.99	1.69	1.92	1.51	0.95	0.96	1.17	1.01	1.1	1.14	1.15	1.01	1.05	0.98	1.08	1.12
	P	1.22	1.09	1.15	1.01	1.04	1.08	0.98	0.87	0.83	0.22	0.16	3.67	1.33	0.86	0.88	0.36	0.72	1.56	1.41	1.63	1.27	1.3	0.85	1.45	2.31	0.95	0.26	0.94	0.95	0.91	0.98	1.03	0.95	0.94	1	0.98
	H	1.06	1.19	0.99	1.02	0.92	0.8	0.86	0.85	1.08	0.63	0.92	0.78	0.97	0.94	0.69	1.22	0.86	0.45	0.78	0.53	1.16	0.83	0.78	1.37	0.92	1.21	0.88	1	1.04	0.94	1.01	0.88	1.2	1.24	0.92	0.89
	K	0.93	0.94	0.96	1.05	0.92	1.07	1.05	0.94	1.11	1.2	0.93	0.95	1.21	0.98	0.62	0.82	0.69	0.44	1.04	0.46	0.58	0.78	0.49	0.92	0.95	1.46	1.04	1.11	1.04	1	0.96	1.01	1.18	1.01	0.93	1
	R	0.84	1.01	0.99	0.89	1.04	0.9	1.01	1.05	0.98	1.39	0.87	0.8	1.14	0.78	0.49	0.97	0.58	0.24	0.83	0.49	0.91	1.08	0.72	1.24	0.96	1.82	1.21	0.99	1.04	1.08	0.89	0.86	1	0.93	1.12	0.92
	S	1	1.08	0.89	1	0.95	0.88	0.99	0.93	1.08	1.13	1.24	0.91	0.96	1.11	0.54	1.14	1.56	1.27	1.24	1.36	1.04	0.99	1.33	1.04	0.89	0.82	0.87	0.9	0.9	1.06	0.89	0.99	0.94	0.91	0.95	0.98
	T	1.21	1.08	1	0.98	0.99	0.94	1.04	0.94	1.06	1.2	0.99	0.76	0.84	1.19	0.79	1.21	1.36	0.83	1.25	1.03	0.84	0.89	1.03	0.84	0.74	1.04	0.91	0.97	0.93	1.16	1.09	0.96	0.89	0.98	1.05	1.15
	N	0.97	0.88	1.12	1.44	1.08	1.12	0.92	0.98	1.02	1.24	0.98	0.99	1.32	0.79	0.53	0.83	0.59	0.58	0.73	0.83	1.36	1.02	0.79	0.88	0.76	1.21	1.15	1.13	1.08	1.13	1.01	1.03	0.91	1.12	0.94	0.91
	Q	0.92	1.05	0.78	1.02	0.69	0.9	1.06	0.97	1.04	1.25	0.61	0.87	1.01	1.28	0.67	1.21	1.03	0.93	1.03	0.77	1.37	0.98	0.88	1.08	1.08	1.42	1.04	0.87	0.96	0.95	0.84	1.34	1.1	1	1.01	1.14
E	Length = 17	N-10	N-9	N-8	N-7	N-6	N-5	N-4	N-3	N-2	N-1	N0	N+1	N+2	N+3	N+4	N+5	N+6	N+7	N+8	N+9	N+10	C-5	C-4	C-3	C-2	C-1	C0	C+1	C+2	C+3	C+4	C+5	C+6	C+7	C+8	C+9	C+10
	W	1.01	0.97	1.18	0.76	1.05	0.84	0.92	1.46	0.87	1.16	0.54	0.08	0.7	1.16	1.77	1.73	1.28	0.66	0.29	0.29	0.33	0.7	0.45	0.66	0.83	0.58	0.66	0.71	1.13	0.97	1.01	0.59	0.85	1.15	1.41	0.81	1.28
	F	1.03	1.2	1.1	0.94	1.07	1.11	1.19	1.11	1.1	1.07	0.7	0.57	0.71	1.1	2.54	2.28	1.39	0.59	0.77	0.5	0.36	0.45	0.48	0.73	0.56	0.85	0.57	1.22	0.85	1.17	1.1	0.93	0.97	1.07	0.93	1.3	0.71
	Y	1.12	0.82	0.82	1.35	1.25	1.11	1.3	1.11	1.16	1.08	0.94	0.42	0.71	1.08	3.1	2.56	1.31	0.66	0.79	0.5	0.69	0.79	0.83	0.98	0.54	0.92	0.66	0.93	1.09	0.88	1.16	0.87	1.09	1.39	1.07	1.4	0.88
	I	0.97	0.9	0.89	0.86	0.85	1.01	0.91	0.85	0.9	0.78	1.22	0.78	0.65	0.6	1.53	1.24	1.07	0.99	1.04	0.81	0.94	1.11	1.1	1.1	0.73	1.08	0.34	0.87	1.03	0.91	1.04	1	0.9	0.89	1.02	0.71	0.84
	V	1.08	0.88	0.81	1.02	1.08	0.97	1.25	1.16	0.95	0.7	1.37	0.58	0.79	0.87	1.24	1.22	0.96	0.89	0.92	1.25	1.19	1.08	1.3	1.09	0.9	1.22	0.48	1.05	1.01	0.9	1.08	0.98	1.09	1.09	1.09	1.04	0.91
	L	0.9	0.99	0.94	0.87	0.89	1	0.9	1.03	1.06	0.87	0.72	0.47	0.69	0.47	0.77	0.74	0.57	1	0.93	0.59	0.61	0.98	0.93	0.77	0.52	0.73	0.69	1.15	0.99	1.04	0.88	1	0.98	0.93	0.88	0.88	1.01
	M	0.96	1.12	1.32	1.01	0.78	0.92	1.25	1.28	1.41	1.1	0.41	0.33	0.41	0.39	0.39	0.72	0.91	0.88	0.8	0.44	0.36	0.47	0.8	0.47	0.52	0.55	0.63	1.23	1.06	1.29	1.15	1.04	1.19	0.99	1	0.77	0.91
	C	0.45	0.68	0.61	0.66	0.63	0.63	0.63	0.57	0.65	0.62	0	0	0.05	0.1	0.1	0.08	0.16	0.1	0.21	0.36	0.23	0.18	0.26	0.16	0.16	0.05	0.05	0.89	0.79	0.63	0.74	0.82	0.77	0.93	0.53	0.88	0.48
	D	1.21	1.12	1.04	1.06	1.04	0.9	0.92	0.95	0.99	0.97	2.17	1.52	1.56	1.51	0.61	0.65	0.54	0.86	0.87	0.75	0.96	0.93	1.03	0.97	1.79	1.29	1.26	0.99	1	0.98	1	0.97	1.04	1.07	1.13	0.99	1.2
	E	0.98	1.17	1.14	1.1	1.02	1.06	0.87	0.98	1.17	1.24	1.23	0.85	1.4	1.31	1.04	1.01	0.83	0.83	0.84	1.13	1.23	1.15	1.05	1	1.33	1.19	1.08	1.24	1.2	1.04	1.05	0.96	0.91	1.12	1.1	1.25	1.09
	G	1.09	1.14	0.99	0.99	0.96	0.87	0.9	1.02	0.87	1.07	1.49	0.92	1.26	1.05	0.5	0.69	1.25	1.51	0.94	1.02	0.92	0.69	0.86	0.84	1.34	0.66	1.5	0.86	1.04	0.91	0.97	1.06	0.89	0.95	0.97	0.88	0.93
	A	0.99	0.93	1.2	1.1	1.16	1.17	1.11	1.03	1.08	1.08	1.2	0.82	0.94	1.22	1.11	1.35	1.76	2.26	1.97	2.4	2.29	1.97	2.09	1.46	1.15	1.03	0.93	1.11	1.11	1.13	1.37	1.1	1.05	1.05	1.06	1.04	1.02
	P	1.09	1.13	1.08	1.03	1	1.03	0.99	0.95	0.74	0.31	0.16	4.59	1.56	0.99	1.23	0.52	0.69	1.04	1.53	1.48	1.51	1.29	0.86	1.31	1.22	2.54	1.36	0.4	0.91	0.88	0.9	1.1	0.9	1.07	0.94	1.08	0.9
	H	1.01	1.1	1.1	0.88	0.9	0.95	0.52	0.89	1.04	0.76	0.69	0.59	0.96	1.08	1.06	0.99	0.79	0.54	0.49	0.69	0.59	0.84	0.44	1.33	1.18	1.28	1.16	0.95	0.92	1.13	0.88	0.76	1.11	1.27	1.22	0.84	1.12
	K	0.95	0.82	1.14	0.91	0.94	1.02	0.97	0.94	1.09	1.18	0.79	0.89	1.18	1.02	0.66	0.83	0.74	0.55	0.7	0.81	0.48	0.79	0.56	0.97	0.85	0.98	1.4	1.1	1.1	0.89	0.86	0.98	1.23	0.89	0.91	0.87	1.01
	R	0.84	0.75	0.94	0.96	1.04	1.08	0.84	1.07	0.81	1.13	0.8	0.95	1.08	0.84	0.8	0.83	0.84	0.36	0.54	0.67	0.64	0.98	1	1.14	1.05	0.87	1.8	1.2	1.07	1.09	0.86	0.94	1.11	0.81	1	1.06	1
	S	1.1	0.94	1.08	1.14	1.05	0.94	1.05	1	1.04	1.06	1.19	0.85	0.96	1.13	0.64	0.89	1.4	1.39	1.31	1.21	1.19	0.92	1.27	1.15	1.03	0.69	0.92	0.89	0.9	0.97	0.91	0.95	0.86	0.78	0.95	1.06	1.07
	T	1.06	1.21	0.95	1.07	0.95	1.13	1.03	0.9	1.06	1.31	0.96	0.93	0.99	1.25	0.88	0.98	1.33	1.09	1.2	1.2	1.1	0.78	0.92	0.97	0.77	0.88	0.89	0.97	0.93	1.14	1.09	1.01	1.09	0.88	0.93	0.97	1.09
	N	0.74	0.87	0.81	0.95	1.23	1.09	1.12	0.91	1.11	1.39	1.05	1.11	0.99	1.11	0.53	0.72	0.61	0.46	0.69	0.72	0.89	1.25	0.81	0.74	1.23	0.62	1.23	1.01	1.09	1.14	1.02	1.12	0.97	1.02	0.95	0.93	1.06
	Q	1.07	1.05	0.82	0.95	0.88	0.81	1.19	0.95	0.87	1.19	0.63	0.72	1.05	1.2	0.89	1.03	1.09	1.01	1.03	0.71	1.1	1.06	0.88	1.11	1.33	0.97	1.38	1.03	0.67	0.92	0.84	1.27	1.07	1.16	1.13	1	1.29
F	Length = 18	N-10	N-9	N-8	N-7	N-6	N-5	N-4	N-3	N-2	N-1	N0	N+1	N+2	N+3	N+4	N+5	N+6	N+7	N+8	N+9	N+10	C-6	C-5	C-4	C-3	C-2	C-1	C0	C+1	C+2	C+3	C+4	C+5	C+6	C+7	C+8	C+9	C+10
	W	0.44	1.03	1.03	0.95	0.66	0.88	1.1	1.1	1.46	1.02	0.58	0.29	0.65	0.73	1.74	2.47	2.18	1.38	0.29	1.02	0.44	0.22	0.44	0.58	1.31	0.44	0.87	0.51	1.25	1.18	1.48	0.89	0.89	0.67	2.1	0.6	1.06	0.76
	F	1.22	1.16	1.22	1.32	1.02	0.91	1.29	0.63	0.96	1.12	0.71	0.41	0.65	1.04	1.69	1.83	2.13	1.12	0.9	0.55	0.35	0.38	0.33	0.57	0.49	0.65	0.68	0.85	1.24	0.92	0.89	0.92	1.09	0.82	0.79	0.88	0.97	0.74
	Y	1.09	1.05	0.86	1.02	1.64	1.51	1.54	1.27	1.17	1.04	0.84	0.19	0.55	1.01	2.04	2.17	1.72	1.46	0.65	0.58	0.78	0.65	0.32	1.33	0.68	0.58	0.84	0.52	0.85	0.79	0.93	1.13	1.23	1.44	1.01	1.28	1.22	0.92
	I	0.94	0.91	0.91	1.01	0.91	0.91	0.89	0.98	1.14	0.64	1.26	0.5	0.52	0.71	1.28	1.14	1.4	1.14	1	0.9	0.71	0.64	0.76	1.14	0.76	0.69	0.76	0.31	1.13	0.85	1.23	0.97	1.07	1.03	0.91	0.74	0.59	0.77
	V	0.93	0.99	0.98	0.94	1	1.03	1.08	1.24	1.03	0.77	1.15	0.57	0.71	0.69	1.04	1.24	1.08	0.92	1.07	1.08	1.15	1.33	1.11	0.89	1.08	0.89	1.04	0.41	1.1	0.9	1.21	1.06	1.02	1.09	1.11	0.89	0.82	0.93
	L	0.8	1.04	0.87	0.85	0.95	1.05	0.98	0.89	1.01	0.81	0.77	0.46	0.55	0.55	0.54	0.7	0.72	0.83	0.81	0.85	0.59	0.66	1.13	0.87	0.63	0.59	0.69	0.74	1.06	0.96	1.06	0.94	1.09	0.88	0.88	0.75	0.96	0.88
	M	1.21	1.26	1.06	1.51	0.75	0.75	1.31	1.1	1.45	1.69	0.3	0.4	0.35	0.45	0.7	0.55	0.8	1.2	0.9	1.25	0.6	0.4	0.55	0.5	0.45	0.6	0.3	0.65	1.21	1.12	0.91	1.17	1.02	0.98	1.08	1.24	0.68	0.94
	C	0.43	0.43	0.51	0.35	0.58	0.66	0.35	0.58	0.85	0.62	0.04	0	0.04	0.08	0.08	0.04	0.12	0.04	0.12	0.42	0.19	0.12	0.31	0.27	0.12	0.04	0.15	0.04	0.74	0.59	0.59	0.79	0.91	0.68	0.96	0.44	0.48	0.36
	D	1	1	1.11	1.07	1.12	0.82	0.75	0.71	0.82	0.74	2.26	1.78	1.69	1.45	0.83	0.69	0.45	0.83	0.89	0.85	0.87	1.11	0.72	0.74	0.98	1.69	1.15	1.11	1.07	0.89	0.72	0.97	0.67	0.99	0.85	1.18	1.14	0.74
	E	0.9	1.14	0.97	0.89	1.1	1.12	0.71	0.95	0.9	1.21	1.32	0.76	1.23	1.17	1.06	1.11	0.79	1	0.96	0.94	0.94	1.03	1.05	1.14	1.2	1.29	1.21	1.42	1.05	1.28	1.16	0.96	0.92	1.47	1.27	1.24	1.31	1.16
	G	1.24	0.95	1.05	0.92	0.95	0.86	1.01	1.08	0.93	1.21	1.41	1.01	1.35	1.13	0.82	0.68	0.77	1.28	1.05	1.11	0.94	0.9	0.99	0.77	1.2	1.4	0.68	1.52	0.88	0.97	0.66	0.94	0.93	1.02	0.82	0.96	1.06	1.05
	A	1.2	1.02	0.99	1.05	1.25	1.29	1.17	1.13	1.2	1.09	1.25	0.55	1.02	1.3	1.21	1.2	1.55	1.73	2.05	2.15	2.31	2.33	2.32	1.8	1.33	1.28	1.11	0.98	1.25	1.1	1.23	1.33	0.92	1.14	1.05	1.15	1.17	1.05
	P	1.18	1.24	1.24	1.37	0.97	1.09	0.99	1.18	0.69	0.45	0.34	6.18	1.61	1.56	1.38	0.71	0.88	1.08	1.08	1.27	1.58	1.62	1.01	1.5	1.54	1.43	3.1	1.43	0.31	1.1	1.05	1.16	1.04	0.94	1.08	1.29	0.97	1.16
	H	1.07	0.94	0.81	1.24	0.81	0.81	0.98	0.47	0.98	1.14	0.63	0.25	0.93	0.97	0.97	1.1	1.18	0.97	0.68	0.55	0.59	0.63	0.8	0.8	1.01	1.1	1.01	1.52	0.69	0.65	0.69	0.65	0.91	1.48	0.83	1.36	1.1	1.33
	K	0.92	0.92	1.17	0.91	0.89	0.93	1.01	1.07	0.83	1.42	0.85	0.65	1.29	1.12	1.02	0.85	0.71	0.69	0.73	0.85	0.65	0.73	0.69	0.79	0.96	0.96	0.87	1.37	1.15	0.88	1.24	0.86	1.3	0.97	1.02	1.04	0.92	0.95
	R	0.98	0.94	0.92	1.01	0.91	0.91	1.07	1.16	1.12	1.45	0.81	0.71	1.49	0.64	0.77	1.1	0.91	0.54	0.75	0.48	0.77	0.77	0.71	1.12	1.04	1.1	0.98	1.47	1.25	1.16	0.94	0.85	1.07	0.87	0.96	1.14	1.11	1.01
	S	1.05	0.9	0.95	1.04	0.83	0.99	1	0.96	1.19	1.01	1.11	0.61	1.06	1.35	0.82	0.85	0.99	0.98	1.35	1.17	1.25	1.1	1.34	1.17	1.25	1.01	0.86	0.84	1.03	1.01	0.83	1	0.99	0.89	1.13	0.8	1.08	1.01
	T	0.97	0.97	1.49	0.95	1.19	1.07	1.03	0.79	0.99	0.89	1.01	0.82	0.94	0.95	0.92	1.47	1.33	1.07	1.06	1.09	1.21	0.9	0.95	0.78	0.84	0.94	0.72	0.75	0.98	1.04	1.06	1.06	0.98	0.74	0.87	1.01	0.78	1.39
	N	0.88	1.01	0.65	0.93	1.11	1.06	0.98	1.05	0.82	1.07	1	0.61	0.97	0.59	0.74	0.48	0.38	0.66	0.66	0.64	0.79	0.89	0.97	0.77	0.79	0.82	0.56	1.3	0.67	1.3	0.99	0.86	0.97	1	0.71	0.93	1.09	0.96
	Q	1.03	0.96	0.81	0.89	0.85	0.8	0.98	1.31	0.93	1.08	0.57	0.69	0.88	1.28	1.17	0.86	0.93	0.8	0.97	0.8	1.04	0.97	0.86	1.02	1.19	0.88	1.08	1.3	1.01	0.99	0.99	1.08	0.95	0.8	1.17	0.96	1.01	1.39
G	Length = 19	N-10	N-9	N-8	N-7	N-6	N-5	N-4	N-3	N-2	N-1	N0	N+1	N+2	N+3	N+4	N+5	N+6	N+7	N+8	N+9	N+10	C-7	C-6	C-5	C-4	C-3	C-2	C-1	C0	C+1	C+2	C+3	C+4	C+5	C+6	C+7	C+8	C+9	C+10
	W	0.61	0.36	0.84	0.72	0.6	0.84	0.72	0.95	0.71	0.95	0.48	0	0.6	0.12	0.83	2.14	2.5	1.79	0.36	1.19	0.48	0.24	0.12	0.71	1.43	0.95	0.6	0.71	0.6	0.98	1.83	1.84	1.23	0.74	0.74	0.87	0.62	0.87	1.75
	F	1.27	1.27	1.4	1.21	1.4	0.88	1.25	1.29	0.92	1.34	0.32	0.42	0.65	0.78	1.15	1.75	2.03	1.85	1.15	0.78	0.51	0.6	0.42	0.37	0.46	0.55	0.32	1.34	0.69	1.47	0.95	1.14	1.34	1.2	0.63	1.06	0.53	0.72	0.63
	Y	1.1	0.82	1.31	1.09	1.42	1.31	1.25	0.97	1.24	1.46	0.87	0.27	0.43	0.65	0.97	1.14	1.3	2	1.24	0.59	0.92	0.65	0.54	1.3	0.97	0.54	0.65	0.65	0.49	0.72	0.83	0.72	1.34	1.29	1.13	1.13	1.58	0.85	1.14
	I	0.67	0.86	0.74	0.9	0.51	1.17	0.85	0.97	0.85	0.5	1	0.5	0.39	0.42	0.89	0.66	1.04	1.62	0.85	1	0.46	0.62	1.04	0.62	0.81	0.81	0.7	0.89	0.31	1.15	0.99	1.23	1.4	1.12	0.93	0.52	0.57	0.93	0.81
	V	1.17	0.89	0.86	1.11	0.7	1.05	0.85	1.25	1.37	0.77	1.2	0.52	0.92	0.67	0.75	1	1.2	1.02	1.1	1.12	1.15	1.47	1.3	1.12	1.3	1.05	0.7	0.87	0.57	1.1	1.2	1.1	1.08	1.32	1.17	0.99	0.97	0.81	0.86
	L	1.24	1.16	1.03	0.94	1.01	0.9	1.24	0.95	1.16	0.96	0.69	0.36	0.58	0.36	0.55	0.67	0.53	0.71	0.69	0.64	0.67	0.67	0.76	0.87	0.8	0.78	0.76	0.58	0.58	0.9	0.91	1.07	0.94	1.1	0.8	0.76	0.93	0.7	0.74
	M	0.96	0.64	1.27	0.4	1.19	0.79	1.5	0.79	1.34	1.34	0.39	0.24	0.24	0.47	0.55	0.47	1.1	0.16	0.79	0.87	0.55	0.55	0.31	0.71	0.47	0.94	0.47	0.79	0.55	1.13	0.65	0.81	1.22	0.98	1.07	0.82	1.15	0.41	0.33
	C	0.41	0.55	0.2	0.41	0.54	0.94	0.6	0.4	0.6	0.54	0	0.13	0	0.07	0	0	0.07	0	0.27	0.07	0.07	0.13	0.27	0.13	0.13	0.07	0.2	0	0	0.83	0.55	0.9	1.04	0.56	1.12	0.91	0.42	0.98	0.35
	D	0.97	1.26	0.94	1.06	0.81	0.68	0.71	0.84	0.59	0.74	2.66	1.54	1.48	1.36	1.08	0.87	0.49	0.87	0.9	1.2	0.59	0.9	0.77	1.05	1.02	1.24	1.51	1.08	0.99	0.67	1.14	0.95	0.8	0.87	1.32	0.9	1.23	1.03	1.17
	E	0.91	1.09	0.9	0.95	1.15	0.9	0.77	0.62	0.84	0.89	1.29	0.67	1.09	1.19	1.54	1.29	0.97	1.07	0.87	0.94	0.89	0.89	0.94	0.92	0.92	0.99	1.47	1.32	1.27	0.74	0.94	0.97	0.8	0.98	1.53	1.32	1.04	1.4	1.25
	G	1.11	1.29	1.24	0.93	1.01	0.95	0.96	0.98	0.9	1.11	1.68	0.81	1.53	1.29	0.94	1.09	0.68	0.94	0.83	1.14	1.38	1.03	0.94	0.57	0.81	1.27	1.09	0.59	1.73	0.76	0.79	0.74	0.7	0.93	0.84	1.12	0.89	0.89	1.05
	A	0.99	0.88	0.98	1.15	1.28	1.55	1.42	1.46	1.58	1.29	1.31	0.7	0.99	1.2	1.2	1.14	1.54	1.67	2.05	2.05	2.34	2.57	2.45	1.88	1.75	1.24	0.99	0.86	0.89	1.23	1.26	1.28	1.05	1.16	1.23	1.26	1.35	1.32	1.11
	P	1.09	1.11	1.27	1.45	1.24	0.97	0.86	1.46	0.7	0.39	0.37	7.26	1.85	1.57	1.96	0.97	0.91	0.94	0.81	1.23	1.46	1.33	1.59	1.57	1.38	1.23	1.59	3.21	1.51	0.4	0.88	0.86	1.24	1.22	1.06	1.01	1.12	1.23	1.1
	H	1.05	0.63	0.7	1.26	0.91	1.18	0.42	0.42	0.69	0.69	0.55	0.35	1.11	0.83	1.24	1.24	0.76	1.11	1.66	0.69	0.62	0.35	0.62	1.11	0.83	1.31	0.97	1.24	0.97	0.92	0.64	0.57	0.86	1.15	0.58	0.79	1.59	0.72	1.16
	K	0.84	0.81	1.19	0.96	0.67	0.86	1.11	0.86	0.6	1.4	0.92	0.67	1.21	1.59	1.08	0.92	1.14	0.41	0.79	0.7	0.83	0.83	0.54	0.63	0.73	0.51	1.05	0.98	1.49	1.21	1.11	0.85	1.31	0.99	0.96	0.99	0.96	0.83	1.07
	R	1	1.13	1.09	1	0.77	0.99	0.8	1.24	0.8	1.18	0.83	0.57	1.11	1.02	0.83	0.92	0.92	0.76	0.54	0.35	0.41	0.7	0.83	0.76	1.11	1.21	1.4	0.67	1.5	1.64	1.21	0.95	0.72	0.66	0.63	1.33	0.87	0.97	1.1
	S	1.03	0.92	1.13	0.76	1.09	1.15	0.99	0.84	1.36	1.14	1.19	0.54	1.27	1.32	0.91	0.99	0.95	0.88	1.47	1.38	1.25	1.21	1.21	1.4	1.29	1.27	1.16	0.73	0.78	1.08	0.91	0.82	0.85	0.87	0.94	1.08	0.99	1.15	0.93
	T	0.82	0.91	0.65	1.07	1.32	1.04	1.23	0.89	1.14	1.06	0.64	0.53	1.09	1.17	0.78	1.03	1.42	0.98	0.95	1.14	1.23	0.78	0.81	0.95	0.89	1.17	0.67	0.84	1.06	0.97	0.95	1.06	1.01	0.78	1.05	0.85	0.96	1.37	1.17
	N	0.97	1.1	0.88	1.13	0.92	0.79	0.96	0.75	0.83	1.16	1.04	0.66	0.58	0.62	1	0.95	0.62	0.5	0.66	0.46	0.54	0.75	0.66	1.16	0.91	0.71	1.2	0.87	1.16	1.15	1.36	1.03	1.07	1.03	0.74	0.78	0.78	0.78	1.09
	Q	1.02	1.05	0.9	0.87	0.94	0.68	0.97	1.15	0.82	1.07	0.43	0.39	0.82	1.36	1.04	1.18	0.89	0.96	1.07	0.89	1.07	0.89	1	0.79	0.75	1.04	1	1.14	1.5	1.21	0.92	1.33	0.78	0.71	1.01	0.97	1.16	1.08	1.09
H	Length = 20	N-10	N-9	N-8	N-7	N-6	N-5	N-4	N-3	N-2	N-1	N0	N+1	N+2	N+3	N+4	N+5	N+6	N+7	N+8	N+9	N+10	C-8	C-7	C-6	C-5	C-4	C-3	C-2	C-1	C0	C+1	C+2	C+3	C+4	C+5	C+6	C+7	C+8	C+9	C+10
	W	0.35	0.71	0.53	1.23	1.06	0.88	0.53	0.88	0.52	0.52	0.35	0.35	0.87	0.17	0.35	2.27	1.74	1.92	1.05	1.74	0.87	0.35	0.17	0.87	1.57	0.87	1.05	0.87	0.87	0.17	0.54	1.62	1.08	1.09	1.28	0.18	0.92	0.37	1.67	0.56
	F	1.14	1.28	1.28	1.56	1.49	0.85	1.06	1.2	1.34	0.91	0.63	0.42	0.49	0.84	1.12	1.26	1.19	2.1	1.61	1.26	0.7	0.7	0.35	0.28	0.35	0.28	0.21	0.63	0.7	0.98	1.08	1.37	1.53	1.02	0.88	1.33	0.52	0.37	0.6	0.6
	Y	0.89	1.14	1.05	1.37	1.21	1.29	0.8	1.21	1.52	1.44	1.2	0.32	0.64	0.32	0.72	1.12	1.52	1.36	1.28	0.64	0.72	0.88	0.48	1.36	1.12	0.72	0.64	0.4	0.48	0.72	1.4	1.15	0.91	1.67	0.76	0.76	1.43	1.1	0.85	0.94
	I	0.56	0.43	0.55	0.74	0.74	1.17	0.74	0.8	0.67	0.43	1.1	0.43	0.37	0.24	0.85	0.49	1.04	1.47	1.53	1.22	0.49	0.67	0.43	0.98	0.61	0.49	0.67	0.43	1.1	0.55	0.88	0.69	0.95	1.72	0.83	0.71	0.71	0.97	0.71	0.71
	V	1	0.93	1	1.04	0.92	0.92	1.03	1.26	1.18	0.87	1.18	0.46	0.68	0.68	0.8	0.87	1.1	0.95	0.95	1.03	1.03	1.41	1.37	1.56	1.37	1.33	0.84	0.84	1.07	0.49	1.25	1.06	1.18	0.91	1.16	1.04	0.92	1.16	0.69	0.77
	L	0.79	0.96	1.07	1.01	0.93	1.1	1.38	1.09	1.03	1.15	0.69	0.46	0.52	0.37	0.57	0.54	0.54	0.72	0.77	0.69	0.57	0.54	0.52	0.49	0.83	0.89	0.77	0.6	0.6	0.66	1.03	1.03	1.07	1.04	0.81	0.75	0.99	0.79	0.85	0.97
	M	1.37	1.12	1.36	0.62	0.25	0.87	1.73	0.49	0.99	1.35	0.61	0.74	0.25	0.49	0.25	0.37	0.86	1.23	0.49	1.35	0.86	0.74	0.86	0.37	0.49	0.74	0.86	0.61	0.61	0.74	1.26	1.14	1.02	0.9	1.55	0.78	0.52	0.13	0.91	1.57
	C	0.4	0.4	0.4	0.3	0.59	0.49	0.1	0.1	0.39	0.29	0.1	0	0	0.1	0	0	0	0	0.2	0.29	0.2	0.2	0.2	0.2	0.49	0	0.1	0.1	0	0.1	0.91	0.5	1.01	0.51	0.82	0.93	0.51	0.31	0.31	0.1
	D	0.89	0.85	1.12	1.4	1.08	0.75	0.7	0.7	0.46	0.46	2.83	1.67	1.62	1.58	1.39	0.74	0.7	0.93	0.6	0.56	0.65	0.93	0.65	0.88	1.02	1.58	1.34	1.34	1.16	1.16	0.76	0.86	0.77	0.72	0.97	0.93	0.93	1.08	0.98	1.04
	E	1.2	1.04	1.07	0.77	1.15	1.3	1.03	1.37	0.76	0.99	1.06	0.61	1.33	1.06	1.06	1.14	1.25	0.87	1.1	1.06	1.06	0.57	1.25	0.8	0.95	0.91	1.14	1.44	1.37	1.1	1.13	1.06	0.75	0.79	1.16	1.48	1.12	1.24	1.21	1.41
	G	1.25	0.81	1.08	0.91	0.71	1.04	0.7	0.97	0.9	1.03	1.47	0.83	1.57	1.3	1.03	1.43	0.9	0.77	0.87	1.13	1.7	1.47	1.07	0.9	0.7	0.93	1.1	1.23	0.73	1.3	0.69	0.82	0.73	0.66	0.73	1.02	1.3	1.23	0.95	0.85
	A	1.05	1.32	1.01	0.98	0.91	1.35	1.31	1.21	1.44	1.57	1.14	0.6	1.27	1.03	1.34	1.07	1.44	1.74	1.6	1.8	2.34	2.6	2.4	2.04	2.04	1.64	1.4	0.87	1.03	0.83	1.48	1.17	1.07	1.43	1.37	1.16	1.3	1.27	1.13	0.78
	P	1.17	1.05	1.44	1.36	1.92	1.04	1.04	1.2	1.07	0.48	0.52	7.49	2.58	2.14	2.02	1.51	1.31	0.91	1.35	1.03	1.43	1.74	1.51	1.63	1.66	1.51	1.55	1.66	3.17	1.39	0.37	0.94	1.07	1.16	1.16	1.42	0.96	1.13	1.43	1.6
	H	1.47	1.47	1.04	1.04	1.04	0.42	0.73	0.62	0.41	0.72	0.21	0.21	0.52	0.72	0.52	1.14	1.14	0.62	1.45	0.93	0.52	0.21	0.62	0.21	1.14	0.72	0.83	1.45	1.24	1.14	0.42	0.74	0.64	0.86	0.98	1.2	1.52	1.31	1.1	0.88
	K	1.05	0.9	1.14	1.04	0.89	0.99	1.33	0.89	0.69	0.93	0.69	0.44	0.78	1.13	0.98	1.08	0.69	0.74	0.54	1.03	0.59	1.08	0.54	0.69	0.54	0.88	0.64	0.88	0.88	1.47	1.11	1.11	1.22	1.23	1.29	0.88	0.88	1.09	0.68	1.04
	R	1.02	0.92	0.96	1.25	0.72	0.92	0.82	0.96	1.29	1.53	1.34	0.48	0.95	0.91	0.95	0.81	1	0.67	0.67	0.53	0.53	0.38	0.48	0.72	0.67	1	1	0.86	0.62	1.53	1.42	1.08	1.04	0.85	0.75	0.8	1.11	1.06	1.06	1.42
	S	0.85	0.82	0.94	0.75	0.75	0.94	1.29	0.68	1.13	1.25	1	0.64	0.9	1.45	1	1.16	0.87	0.8	1.16	1.06	1.16	0.9	1.54	1.16	1.19	1.06	1.35	1.22	0.71	0.9	0.69	0.83	0.87	0.94	0.74	0.81	1.15	0.81	1.13	0.89
	T	0.8	1.27	0.63	0.67	1.22	1.13	1.09	0.96	1.04	1.37	0.91	0.37	1.12	1.21	1.21	1.04	1.04	1.25	0.83	1.12	0.83	0.83	0.79	0.96	0.75	1	0.83	1.21	0.75	1.04	0.94	0.77	1.21	0.87	1.13	1.14	0.57	1.1	1.01	0.97
	N	1.36	1.3	0.45	0.84	0.84	0.65	0.45	1.03	1.09	0.58	0.64	0.51	0.58	0.64	0.45	0.83	0.77	0.51	0.45	0.51	0.45	0.64	1.15	1.21	0.89	0.89	0.89	1.15	0.45	0.96	1.45	1.05	1.26	0.87	1.27	0.87	0.81	0.74	1.42	0.88
	Q	1.15	1.26	1.26	1.14	1.26	0.86	0.97	1.31	1.13	1.02	0.51	0.34	0.68	1.41	1.41	1.13	1.24	1.13	1.19	0.96	1.3	0.68	1.02	1.02	0.74	0.74	1.41	1.07	1.36	1.75	1.05	1.4	0.76	0.88	0.71	1.01	1.19	1.25	1.26	1.38
I	Length = 21	N-10	N-9	N-8	N-7	N-6	N-5	N-4	N-3	N-2	N-1	N0	N+1	N+2	N+3	N+4	N+5	N+6	N+7	N+8	N+9	N+10	C-9	C-8	C-7	C-6	C-5	C-4	C-3	C-2	C-1	C0	C+1	C+2	C+3	C+4	C+5	C+6	C+7	C+8	C+9	C+10
	W	0.53	0.53	0.79	0	1.56	0.52	0.52	0.78	0.26	0.78	0.78	0	0.26	0.26	0.78	1.29	1.55	2.07	1.55	2.84	1.03	0.26	0	0.52	0.78	1.03	1.55	2.07	0.52	0.78	0.52	0.79	1.58	1.6	1.06	0	0.27	0.27	1.89	0.81	0.54
	F	1.21	1.81	1.32	1.32	2.51	1.19	0.96	1.08	1.19	1.19	0.59	0.36	0.71	0.24	0.71	1.66	1.07	2.25	1.54	1.54	0.71	0.71	0.47	0.24	0.47	0.71	0.36	1.3	0.59	0.83	1.07	1.93	1.69	0.97	0.73	1.11	1.36	1.23	0.5	0.87	0.37
	Y	1.29	1.03	0.64	1.03	1.02	1.15	0.64	1.27	1.4	1.77	0.51	0.38	0	0.63	0.25	0.38	1.39	1.64	1.64	0.88	1.01	0.63	1.01	1.39	0.88	1.01	0.63	0.25	0.63	0.51	0.76	1.29	1.03	1.69	1.3	0.79	1.45	0.66	0.79	0.93	1.32
	I	0.72	0.51	0.51	0.82	0.81	1.42	0.91	0.71	0.71	0.4	0.7	0.6	0.7	0.3	0.6	0.7	0.7	1.01	1.21	1.91	1.01	0.81	0.6	0.7	1.41	0.91	0.5	0.4	0.5	1.01	0.2	1.03	1.23	0.83	1.66	0.52	0.73	0.63	0.53	0.63	0.74
	V	1.34	0.73	1.03	0.73	1.02	0.9	0.96	1.62	0.78	0.6	1.31	0.24	0.83	0.48	0.48	0.72	0.95	1.01	0.95	0.48	0.83	1.13	1.01	1.49	1.25	0.83	0.72	0.6	0.66	1.55	0.36	1.22	0.97	0.98	1.35	0.68	1.12	1.12	0.56	1.06	0.56
	L	0.97	0.97	0.83	0.96	0.91	0.91	1.09	1.05	1.27	1.17	1.04	0.36	0.59	0.41	0.77	0.72	0.45	0.81	0.41	0.72	0.5	0.59	0.72	0.45	0.95	0.9	0.9	0.59	0.54	0.81	0.63	1.2	0.97	1.35	0.88	1.22	1.17	0.89	0.8	0.71	0.66
	M	0.79	0.79	1.38	0	0.59	0.39	1.37	1.37	1.18	1.55	0.58	0.97	0.39	0.19	0.39	0.58	0.58	0.97	0.39	0.58	0.58	0.58	0.97	0.19	0	0.58	0.39	1.36	0.78	1.17	0.78	1.78	0.4	0.8	1.4	0.81	0.81	0.4	0.61	1.22	1.02
	C	0.49	0.81	0.32	0.32	0.64	0.48	0.32	0.32	0.64	0.48	0	0	0	0	0	0	0	0	0.16	0	0	0	0.16	0.16	0.48	0	0.48	0.16	0.16	0	0	1.3	0.97	0.33	0.82	1.15	0.33	0.33	0.17	0.5	0.17
	D	0.81	1.11	1.54	1.62	1.09	0.95	0.8	0.44	0.66	0.65	2.1	1.59	1.67	1.16	1.88	0.72	0.43	1.01	0.72	0.87	0.51	1.16	0.72	0.58	1.16	1.01	1.52	1.3	1.23	1.3	0.87	0.52	0.59	1.04	0.82	1.05	1.06	0.75	1.14	1.44	0.68
	E	0.67	1.52	1.03	0.73	0.84	1.38	0.54	0.96	1.2	0.36	0.9	1.07	1.07	1.19	1.19	0.84	1.43	0.78	1.02	1.37	1.07	0.66	0.78	1.25	1.02	0.9	1.31	1.43	1.79	1.19	1.37	0.85	0.49	1.04	0.92	1.36	1.06	1.55	1.12	0.88	1.88
	G	1.21	0.74	1.1	1.21	0.83	1.04	0.57	0.94	1.15	0.93	1.39	0.67	1.86	1.5	1.03	1.45	0.72	0.83	0.77	1.39	1.14	1.65	1.24	1.34	0.67	1.08	0.88	1.34	1.19	0.52	1.19	0.58	0.9	0.64	1.01	0.8	0.65	1.24	1.03	0.65	0.92
	A	1.15	1.05	0.85	1.05	0.94	1.29	1.64	1.19	1.19	1.13	1.08	0.54	1.38	1.03	1.08	1.28	1.48	1.77	1.38	1.92	2.26	2.61	2.51	1.97	1.87	1.43	1.13	1.28	1.33	0.79	0.98	1.35	1.45	1.57	1.06	1.53	0.87	1.43	1.08	1.08	0.77
	P	1.09	1.15	1.4	1.34	1.39	0.82	1.33	0.95	0.63	0.44	0.56	7.15	1.69	3.14	2.07	1.63	1.76	1.13	0.88	0.75	1.32	1.25	1.19	1.51	2.01	1.51	1.38	1.25	1.07	2.63	1.19	0.45	1.15	0.9	1.23	1.24	0.91	0.78	1.18	1.71	1.51
	H	1.47	1.14	0.81	0.81	1.29	1.13	0.32	0.81	0.64	0.48	0.48	0.32	1.12	0.64	0.32	0.48	1.12	0.64	1.12	0.96	1.12	0.8	0.48	0.32	0.32	1.44	0.48	0.96	0.64	0.16	0.64	0.82	0.33	0.99	0.82	0.99	1.66	1.5	1.34	1.51	0.34
	K	1.1	1.34	1.33	1.33	1.01	1.09	0.78	0.86	0.54	1.16	0.85	0.62	1	1.08	1.08	1.62	1.47	0.69	1.31	0.93	0.77	0.62	1.08	0.62	0.85	0.77	0.77	0.39	1.47	0.93	2.16	0.94	1.34	1.43	1.11	1.12	1.12	0.88	1.13	0.97	1.13
	R	0.88	0.66	0.51	1.75	1.01	0.94	0.36	1.09	0.87	2.01	1.58	0.36	0.79	0.93	1.51	1.22	0.79	0.93	0.57	0.22	0.65	0.43	0.29	0.86	0.5	0.93	0.86	0.79	0.79	0.86	1.94	1.1	1.39	0.52	0.59	0.52	0.6	1.05	0.98	1.51	1.36
	S	0.85	0.74	1.06	0.85	0.95	0.89	1.68	0.95	1.05	1.3	1.62	0.52	1.41	1.2	0.99	0.83	0.63	0.63	1.1	0.99	1.25	1.3	1.51	1.1	1.1	1.2	1.88	1.3	1.04	0.68	0.47	0.9	0.69	0.86	0.7	0.92	0.81	0.6	1.09	0.82	1.26
	T	0.95	1.09	0.81	0.68	1.21	0.74	1.74	1.14	1.21	1.33	0.47	0.53	0.67	1.2	0.8	1.4	1.4	1.07	1.66	0.67	0.87	0.67	1	0.8	0.6	0.8	0.93	0.87	1.27	1.07	0.87	0.61	1.02	0.62	1.23	0.9	0.9	0.83	1.11	0.98	1.54
	N	1.08	0.87	0.76	0.86	0.43	0.86	0.64	0.96	0.86	1.17	0.32	0.74	0.85	0.53	0.53	0.42	0.74	0.42	0.42	0.42	0.64	0.53	0.64	0.64	0.64	0.96	0.85	0.74	0.53	0.64	1.49	1.19	1.08	1.2	0.76	1.21	1.11	0.88	1.22	1.23	0.78
	Q	0.97	1.24	1.5	0.88	0.44	1.14	1.22	0.96	1.66	1.04	0.78	0.69	0.35	1.13	1.47	0.78	1.21	0.87	1.47	0.95	1.39	0.78	0.87	1.39	0.87	1.04	0.95	1.56	1.56	1.3	1.73	1.15	0.8	0.62	0.8	0.9	1.99	1.71	1.72	0.55	1.09
J	Length = 22	N-10	N-9	N-8	N-7	N-6	N-5	N-4	N-3	N-2	N-1	N0	N+1	N+2	N+3	N+4	N+5	N+6	N+7	N+8	N+9	N+10	C-10	C-9	C-8	C-7	C-6	C-5	C-4	C-3	C-2	C-1	C0	C+1	C+2	C+3	C+4	C+5	C+6	C+7	C+8	C+9	C+10
	W	0.45	0.45	0.45	0.9	0	1.79	1.34	0.45	0	0	0	0.44	0.44	0.44	0.44	0.89	1.33	1.78	0.89	4.45	2.22	0.89	0	0	0.89	0.89	0.89	1.78	2.67	0	1.33	0.89	0.46	0.46	0	0.47	0	0.47	1.88	1.43	1.43	0.48
	F	1.13	2.03	1.79	1.34	3.14	0.67	0.9	0.9	1.57	1.12	0.89	0.67	0.89	0.44	1.33	1.11	1.33	1.78	1.33	0.89	1.11	0.22	0.44	0.44	0.22	0	0.44	0.44	0.67	1.56	0.67	1.11	2.07	0.92	0.93	1.87	0.23	0.47	0.94	0.24	0.72	0
	Y	0.51	1.53	1.27	1.77	1.27	0.25	1.01	0.25	1.01	1.77	0.25	0	0.75	0.25	1.51	0.25	1.01	0.25	1.51	1.01	1.26	1.51	0.75	2.52	0.75	1.01	0.5	1.51	0.5	0.5	1.01	0.5	1.56	1.56	0.52	0.26	1.85	1.06	1.6	0.54	0.81	0.54
	I	1.19	0.79	0.99	0.79	0.39	1.38	0	0.79	0.59	0.39	1.37	0.98	0.59	0.78	0.59	0.39	0.59	1.18	1.76	1.37	1.76	0.78	0.39	1.18	0.2	0.59	0.98	0.78	0.39	0.39	0.78	0.2	1.01	0.61	1.43	0.82	0.62	0.62	0.62	0.21	1.05	0.84
	V	0.89	1	1.32	0.77	1.1	1.65	1.54	1.87	1.32	0.55	0.66	0.66	0.44	0.33	0.44	0.55	0.87	0.98	0.98	0.76	1.09	1.31	0.98	1.31	1.75	0.98	0.55	0.76	0.87	0.76	0.98	0.33	0.79	0.79	0.91	0.57	1.49	1.15	0.92	1.41	0.7	1.05
	L	0.79	1.03	0.71	1.1	0.79	1.1	1.34	0.63	0.87	0.95	0.86	0.55	0.23	0.7	0.78	0.63	0.23	1.1	0.7	0.55	0.78	0.7	0.31	0.39	0.78	0.94	1.25	0.7	0.55	0.78	0.63	0.47	0.73	0.81	0.82	1.07	1.23	0.82	0.91	0.59	0.67	1.09
	M	1.36	2.38	1.01	0	0	0	1.35	0.68	2.7	1.35	1.34	1.34	1.34	1.34	0.34	0.34	0.34	0.34	0.67	1.34	1.01	1.01	1.68	0.67	0.67	0	0.67	0.67	0.67	0	1.01	1.68	2.43	2.09	1.75	1.06	1.76	0.71	0	1.44	1.08	2.16
	C	0.56	0.84	0.28	0	0.28	0	0.28	0	0	0.83	0	0	0	0	0	0	0	0	0	0	0	0	0	0	0	0.55	0	0	0.28	0	0	0.28	0.86	0	0.86	1.45	0.29	0	0	0	0	0.3
	D	1.03	0.65	1.16	1.67	1.03	1.16	0.9	1.03	0.64	0.9	0.89	1.02	1.15	0.89	2.17	0.89	0.89	0.89	0.64	0.89	0.13	0.89	0.26	1.28	1.02	1.15	1.79	0.89	0.77	1.53	1.79	1.15	1.45	1.32	0.8	1.07	1.07	0.94	0.81	0.68	1.23	0.96
	E	0.73	1.15	1.14	0.52	1.55	1.45	1.03	1.24	1.55	0.62	0.62	0.62	0.72	1.34	1.23	1.54	1.23	1.23	1.23	0.82	1.13	1.34	1.03	1.44	1.03	0.72	1.03	1.44	1.75	1.03	1.34	1.34	0.85	1.17	0.96	1.19	0.32	1.94	0.54	1.88	1.32	0.55
	G	1.14	0.7	0.96	0.61	1.22	0.7	0.35	0.96	0.78	1.13	1.56	0.26	1.73	1.73	1.21	0.87	0.43	0.61	0.95	0.52	1.3	1.47	1.47	1.04	1.3	1.3	0.69	0.69	1.65	0.78	0.43	0.52	0.81	0.54	1.08	0.64	0.36	0.73	1.37	1.02	0.84	1.49
	A	1.22	0.73	0.64	1.05	0.73	1.21	1.05	1.05	1.53	1.61	1.36	0.64	1.2	0.96	1.04	1.12	1.68	1.92	1.36	2.16	2.08	2.72	2.24	1.92	1.84	2	1.68	1.84	1.04	0.88	0.96	0.88	0.75	1.16	1.34	1.51	1.26	1.77	0.85	0.86	0.6	1.2
	P	1.1	1.3	1.39	1.29	1.59	0.7	1.29	1.29	0.8	0.6	0.79	6.22	1.98	2.27	2.27	2.57	2.17	1.38	1.19	0.69	1.09	1.09	1.09	1.58	1.88	2.07	1.28	1.48	1.38	1.19	3.06	1.68	0.2	0.61	0.93	1.35	1.25	0.83	0.84	1.17	1.7	0.85
	H	0.9	0.9	0.3	1.19	1.78	0.59	0.89	0.3	0.3	0	0	1.18	0.89	0.89	0.3	0.3	0.3	0.59	0.3	0.59	0.59	0.59	0.59	0.3	0	0.89	1.18	0.89	0.89	1.77	0.3	0.89	0.61	0.92	0.62	1.24	2.17	0.31	1.25	2.22	0.63	0.32
	K	1.16	1.6	1.59	0.87	0.87	1.15	0.72	1.01	0.72	1.44	1.29	0.72	1.58	0.86	1	1.15	1.43	0.72	1.43	1.86	0.14	0.43	1	1	0.86	1	0.57	1.15	0.86	0.72	0.86	1.58	1.93	2.08	0.9	1.2	1.65	1.05	0.76	1.23	0.77	1.23
	R	1.22	0.86	0.73	1.21	0.85	0.73	0.97	0.97	0.97	0.97	2.05	0.96	1.09	0.84	0.84	0.84	1.57	0.72	0.6	0.48	0.48	0.6	0.48	0.48	0	0.24	0.72	0.6	0.72	1.81	1.09	1.33	2.12	0.87	0.63	0.63	0.38	0.38	0.64	1.29	1.04	0.91
	S	0.85	0.47	1.03	1.21	0.84	1.59	1.68	1.31	1.12	1.49	1.48	0.56	1.58	1.67	0.74	1.3	0.83	0.74	1.11	0.74	1.02	0.65	1.76	0.83	0.74	0.65	1.48	1.02	1.3	1.21	0.65	1.02	0.67	1.15	1.16	0.88	1.17	1.27	1.18	1	0.7	1.19
	T	0.48	1.31	0.59	1.54	1.42	0.36	1.07	0.95	0.59	1.3	1.18	0	0.47	0.82	0.47	1.18	0.94	0.94	0.71	1.18	0.59	0.47	0.94	0.59	1.06	0.82	0.59	0.82	0.71	1.18	0.24	0.94	0.73	0.85	1.47	0.62	0.86	0.99	1	0.76	1.89	1.26
	N	1.57	0.39	0.78	0.39	0.19	0.97	0.58	1.36	1.36	0.78	0.19	0.19	0.97	0.19	0.58	0.19	0.58	0.97	0	0.58	0.39	0.19	0.97	0.39	1.16	1.16	0.58	0.19	0.39	0.97	0.77	1.74	1.2	1.6	1.61	0.81	0.81	0.81	2.04	0.83	1.24	1.24
	Q	1.5	1.05	1.49	0.89	0	1.04	0.74	0.89	0.89	0.89	0.59	1.18	0.59	0.74	0.89	1.33	1.03	0.74	1.77	1.18	1.48	0.74	1.18	0.74	1.03	0.74	1.18	1.48	1.33	1.48	1.18	1.77	0.61	0.92	0.62	1.09	1.24	1.4	2.19	1.11	1.43	0.95
K	Length = 23	N-10	N-9	N-8	N-7	N-6	N-5	N-4	N-3	N-2	N-1	N0	N+1	N+2	N+3	N+4	N+5	N+6	N+7	N+8	N+9	N+10	C-10	C-9	C-8	C-7	C-6	C-5	C-4	C-3	C-2	C-1	C0	C+1	C+2	C+3	C+4	C+5	C+6	C+7	C+8	C+9	C+10
	W	0	0	0.74	0	0.72	0	1.43	1.43	0.72	0	0	0	0.72	0	0	0	2.87	1.43	2.87	5.02	3.58	0	0	0	3.58	1.43	2.87	2.87	0	1.43	0.72	0	1.49	0	0	0	0	0	0.76	0.76	0.76	1.52
	F	0.73	3.66	1.45	1.79	2.48	1.42	0.7	2.11	1.05	1.05	0.7	1.05	0.7	0.35	1.05	1.05	0.7	3.51	1.41	1.05	1.41	0.7	0	0.35	0.35	0.35	0.35	0.35	1.41	1.05	1.41	1.41	1.46	1.83	0.73	0.73	0.74	1.85	1.12	0	0.37	0.37
	Y	0.75	0.75	1.85	1.46	0.72	0.72	0.36	1.08	0.72	2.51	0.72	0.36	0.36	0.36	0.36	0.36	1.08	0.36	0.72	1.44	1.44	1.08	2.15	2.15	1.79	1.79	1.44	0.72	1.08	0.36	0	1.44	2.24	1.5	1.5	1.12	0.76	1.51	0.38	0	1.53	1.15
	I	0	0.96	0.32	0.94	0.93	0.93	0.61	1.22	0.92	0.31	1.53	0.31	0.31	0.61	1.22	0.92	0.61	0.92	1.22	1.53	0.92	2.14	0.61	1.83	0.31	0.61	0.31	0	0	0.61	0.92	0	0.64	1.59	0.64	0.32	0.32	0.32	0.65	0.33	0.33	0.65
	V	1.11	0.93	1.65	0.91	0.36	1.26	1.07	2.67	1.24	0.53	1.07	0.53	0.53	0.53	0.53	0.53	1.07	1.6	1.07	0.53	1.42	0.71	1.78	1.6	1.42	1.24	0.71	0.53	1.07	0.18	0.53	0.71	0.93	0.74	0.93	1.48	1.87	0.94	0.76	0.57	1.51	1.13
	L	1.14	1.14	0.5	1.49	0.99	0.62	1.1	0.49	1.22	1.34	0.73	0.85	0.37	0.49	0.24	0.85	0.98	0.73	0.61	0.49	0.49	0.85	0.24	0.85	0.85	0.85	0.85	0.85	0.85	0.61	0.61	0.24	1.02	0.51	0.89	0.89	1.03	0.77	0.78	0.91	0.65	0.78
	M	0.98	0.49	0.97	0.96	0.96	0	0.95	0.47	1.42	1.42	1.42	0.95	1.42	0.95	0	0.47	0	0.47	1.42	1.89	0.95	0.95	0.95	0.95	0	0.47	0.95	0.47	0.95	0	0.95	2.36	1.48	1.48	0.49	1.48	1	1	1.01	1.51	2.01	1.01
	C	0.47	0.94	0	0	0	0.46	0	0	0	0	0	0	0	0	0	0	0	0	0.45	0	0	0	0	0	0.45	0	0	0	0.45	0.45	0.45	0	0.47	0	1.89	0.47	0.48	0.48	0.48	0	0.48	0
	D	0.87	0.22	1.29	1.92	2.32	1.27	1.05	1.05	0.21	1.26	0.84	0.84	1.26	0.42	1.67	1.26	0.63	0.63	0.63	1.05	0.63	0	0.63	0.84	0.84	1.67	1.46	2.09	1.26	0.84	0.84	1.05	0.87	0.44	2.61	0.65	0.44	0.88	1.56	0.89	1.11	0.89
	E	0.46	1.23	1.07	1.21	0.9	1.49	0.89	1.03	1.03	1.03	0.89	1.48	0.59	1.33	1.48	1.33	1.48	1.03	1.03	1.77	1.77	1.03	2.22	0.44	0.74	0.74	0.89	2.07	1.33	1.92	0.59	0.59	0.62	0.77	0.77	0.46	1.09	0.47	1.1	1.89	0.94	0.94
	G	1.03	0.92	1.13	0.45	0.56	1	0.77	0.66	0.77	0.55	0.99	0.33	1.21	1.43	1.54	0.99	0.88	0.77	0.88	0.44	0.44	1.32	1.43	1.21	0.99	0.44	1.1	0.99	0.77	0.99	0.55	1.1	0.57	0.46	0.34	0.8	0.81	0.69	0.82	0.82	0.94	0.58
	A	1.1	0.61	0.84	0.6	0.71	1.06	1.64	0.93	1.64	1.4	1.52	0.7	1.52	0.93	1.17	1.52	1.52	1.52	1.52	1.29	1.05	2.69	1.87	1.87	1.87	1.4	1.64	1.17	0.93	0.7	0.82	0.58	1.1	1.7	1.46	1.46	1.11	1.35	1.24	0.75	1.12	0.99
	P	1.63	1.3	1.13	0.64	1.42	1.58	1.41	0.78	1.25	0.31	1.09	5.01	2.82	2.19	2.82	2.66	1.56	1.72	1.56	0.47	0.94	1.56	1.41	1.56	1.41	1.41	1.56	1.56	1.72	1.25	2.82	1.41	0	0.33	0.98	0.81	1.98	1.65	2.5	1.33	1.66	1.5
	H	0.83	0.83	0.41	1.22	1.6	1.2	1.19	0.4	0.4	0.79	0.4	0.79	0.79	0.4	0	0.79	0.4	0	0	0.4	0.79	0.4	0.79	0	0.79	1.19	0.79	0.79	0.4	0	1.19	1.19	0	0.41	1.65	2.48	1.25	0.84	1.69	1.69	0.42	0.42
	K	1.71	1.07	2.33	0.84	0.21	1.04	1.44	0.82	1.03	1.03	1.64	1.23	0.62	1.85	1.44	1.23	0.82	1.64	1.23	1.64	0.41	0.21	0.62	0.82	0.41	1.23	1.03	0.21	0.82	0.82	1.44	2.46	2.35	1.28	1.07	2.35	0.86	1.3	0.87	0.87	0.44	1.31
	R	1.12	0.93	0.74	1.46	0.72	0.9	0.89	0.89	0.89	2.15	1.25	1.43	1.43	1.43	0.54	1.25	1.61	1.25	0.54	0.54	0.54	0.18	0.54	0.18	0.18	0.89	0.36	0.72	0.54	2.33	1.25	2.33	1.49	0.93	0.75	0.37	0.57	0	0.76	1.71	1.33	1.14
	S	0.81	0.46	0.8	1.14	1.35	0.9	1.45	1	0.89	1.23	1	0.56	1.45	1.34	0.78	0.67	0.45	0.56	1.23	0.67	1.34	0.56	0.67	1.11	0.89	1.34	1.11	0.78	1.23	1.45	1	0.89	0.81	1.16	0.81	1.05	0.94	0.7	1.07	0.95	0.36	1.19
	T	0.38	1.5	0.37	0.92	1.64	0.91	0.36	0.54	1.08	1.08	0.9	0.36	0.18	0.72	0.36	0.72	1.26	0.54	0.36	1.08	0.9	1.26	0.72	0.54	1.08	0.72	0.36	0.9	1.62	0.36	1.08	0.54	0.19	1.88	0.94	0.56	0.95	1.9	0.38	1.34	1.53	1.53
	N	1.29	1.61	0	0.63	0.63	1.25	0.93	1.24	0.62	0.62	0.62	0.31	0	0.93	0.93	0.31	0.93	0.62	0.31	0.62	0.93	0.62	0.62	0.93	2.17	0.93	1.24	0.62	0.31	1.55	1.55	1.24	3.23	2.26	0.97	0.97	0.65	1.31	0.33	0.99	1.98	1.65
	Q	1.99	1	1.78	0.98	0.97	0.58	0.38	1.53	1.34	0.38	0.96	0.77	1.34	0.77	0.96	0.38	0.57	0.38	1.34	1.72	1.72	1.15	0.38	0.77	0.57	0.77	0.96	1.53	1.34	1.53	1.15	0.96	1.2	1	1	1.4	1.41	1.81	0.81	1.43	0.81	0.81
